# Supplementary material for: A phosphoproteomic approach reveals that PKD3 controls PKA-mediated glucose and tyrosine metabolism
Source: PubMed Central journal article supplement (PMC8321662; doi:10.26508/lsa.202000863), 2021-06-18

**FIGURE 4A PAH GAPDH**  
**Higher exposure**

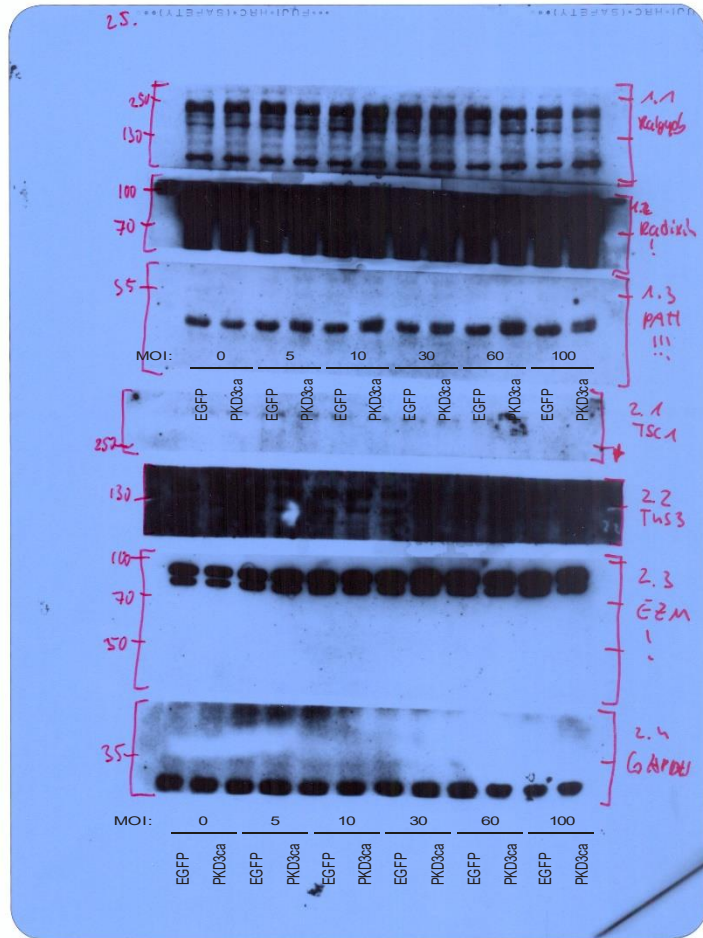

**Lower exposure**

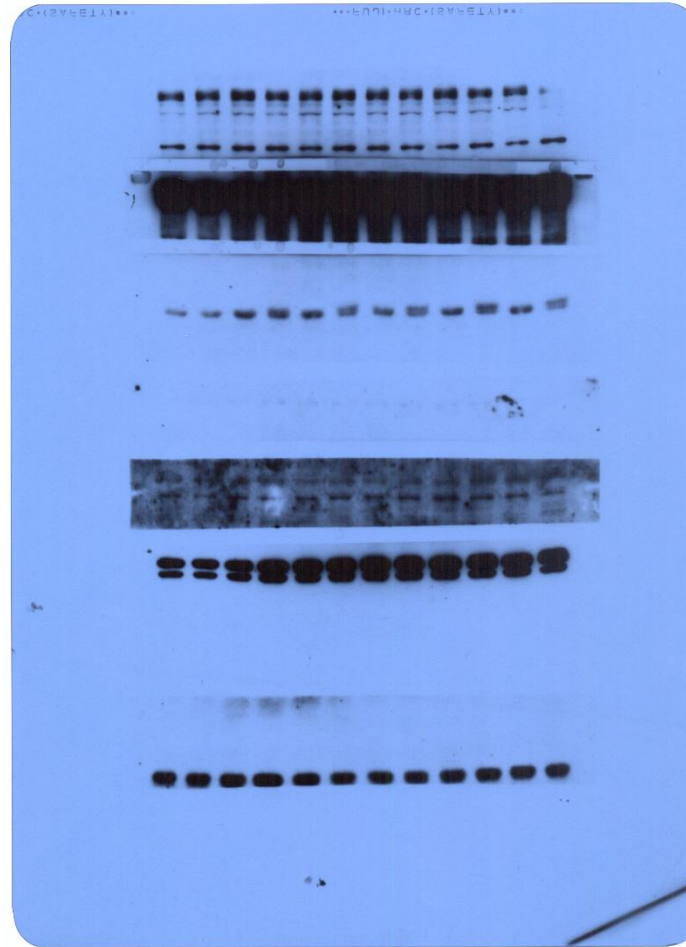

Figure 4F  
higher exposure

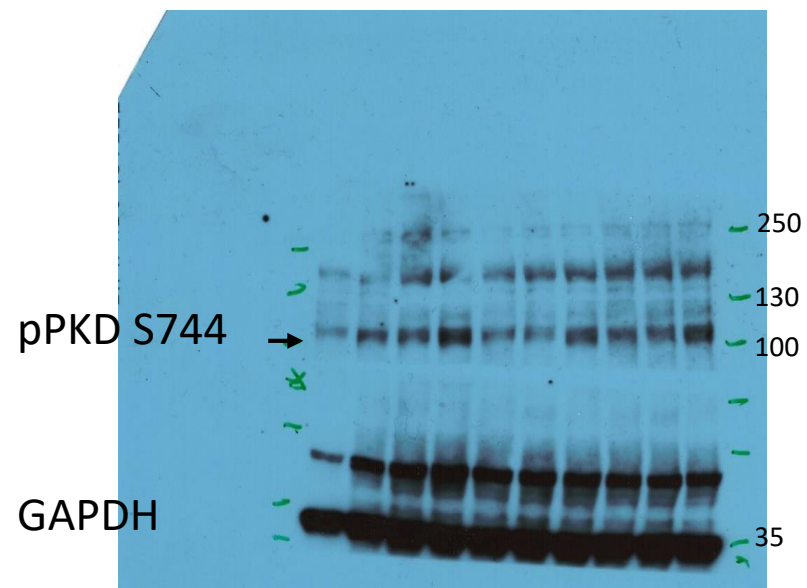

Lower exposure

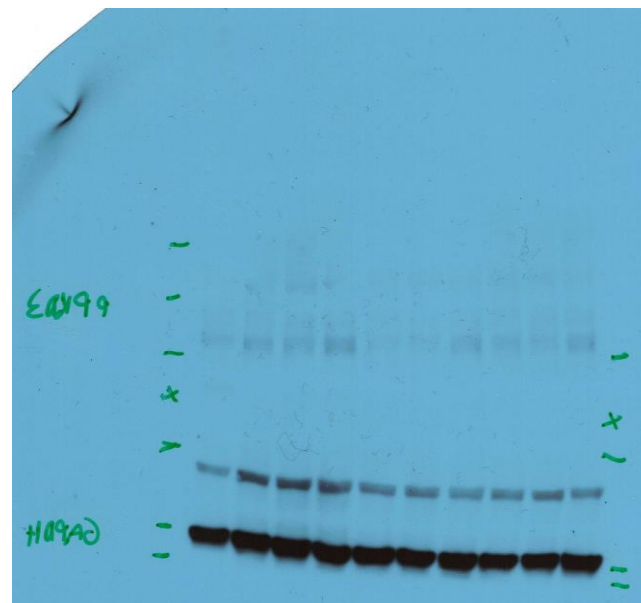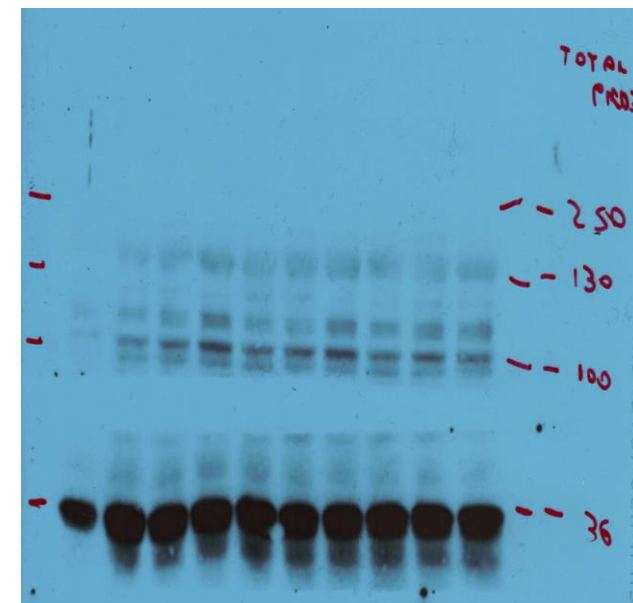

Supplement: LSA-2020-00863_SdataF4.pdf [file LSA-2020-00863_SdataF4.pdf]
