# Supplementary material for: A phosphoproteomic approach reveals that PKD3 controls PKA-mediated glucose and tyrosine metabolism
Source: PubMed Central journal article supplement (PMC8321662; doi:10.26508/lsa.202000863), 2021-06-18

# Figure 4A in vitro kinase assay

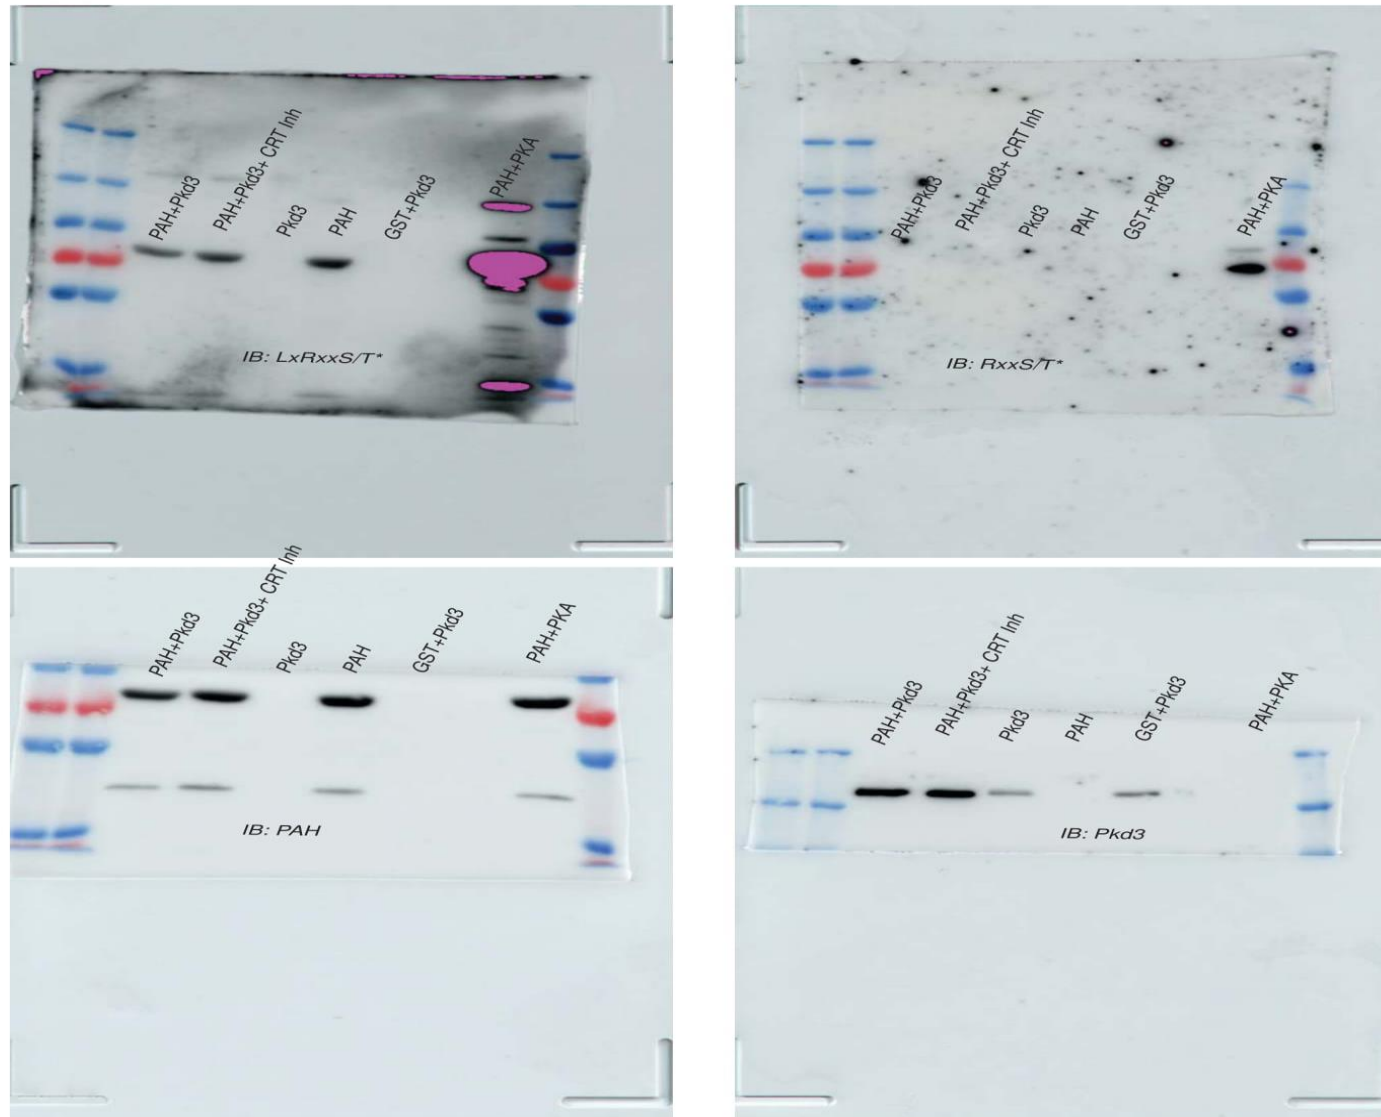

Figure 4A Overexpression of PKD3ca in primary hepatocytes

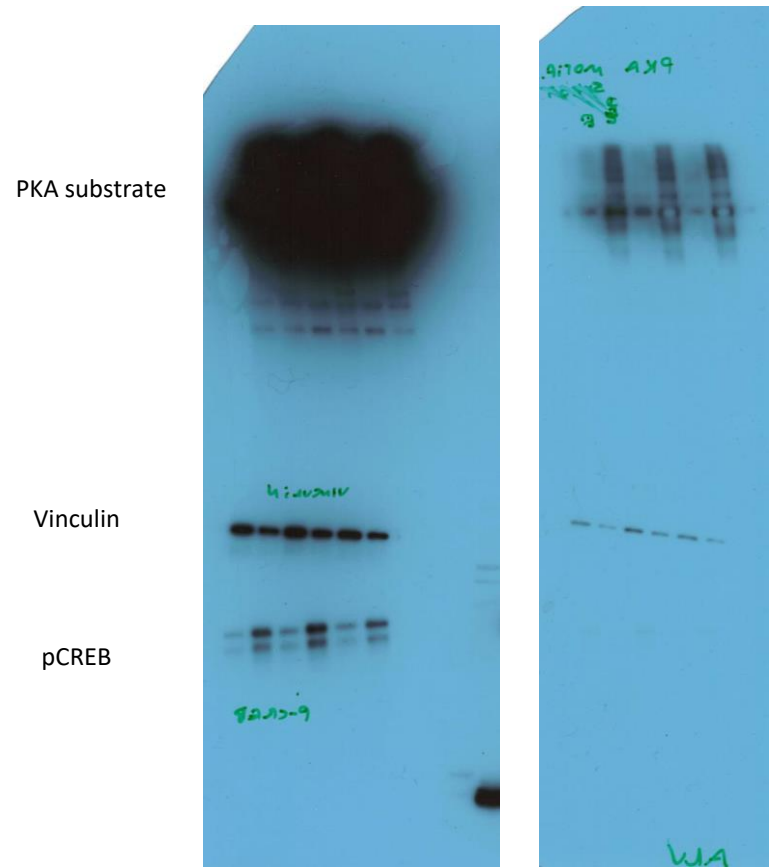

Figure 5C mice experiment DMSO CRT injected with glucagon 10 minutes Vinculin and pPKA thr 197

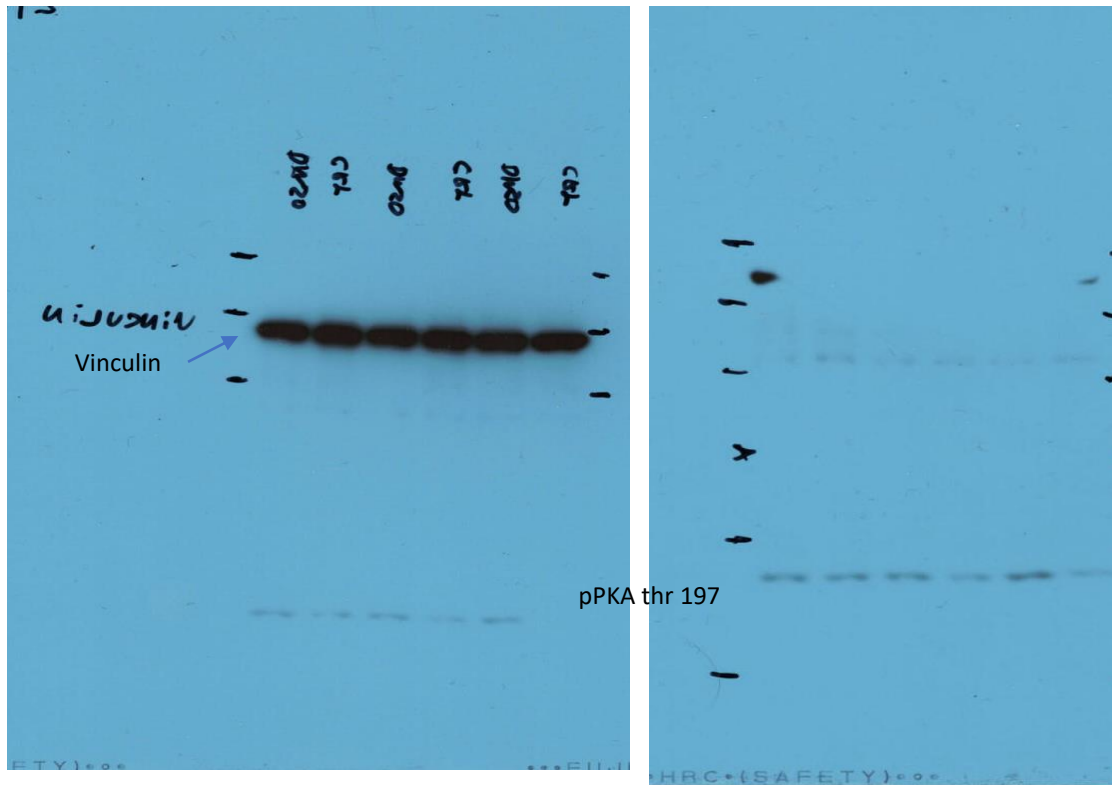

# Figure 5C pPKD S744/748 and GAPDH

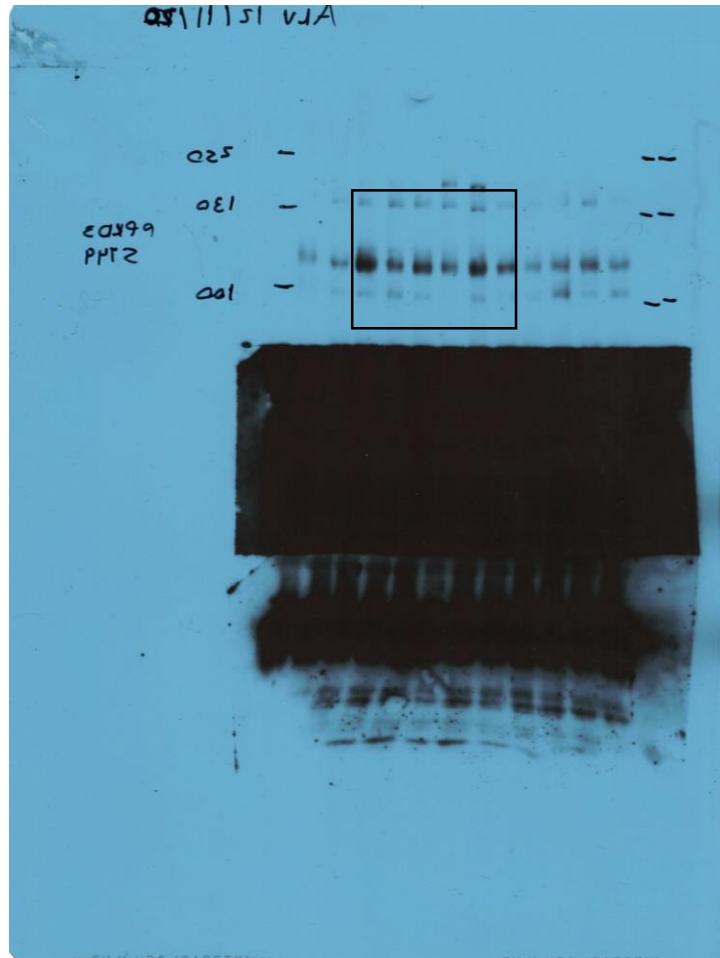

← pPKD s744

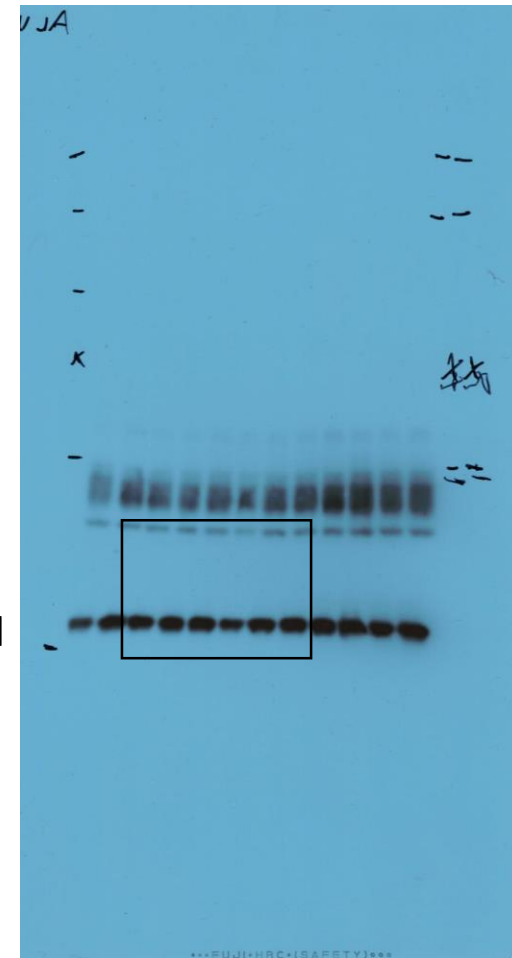

GAPDH

Figure 5D PKA substrate in mice treated with DMSO and CRT inhibitor

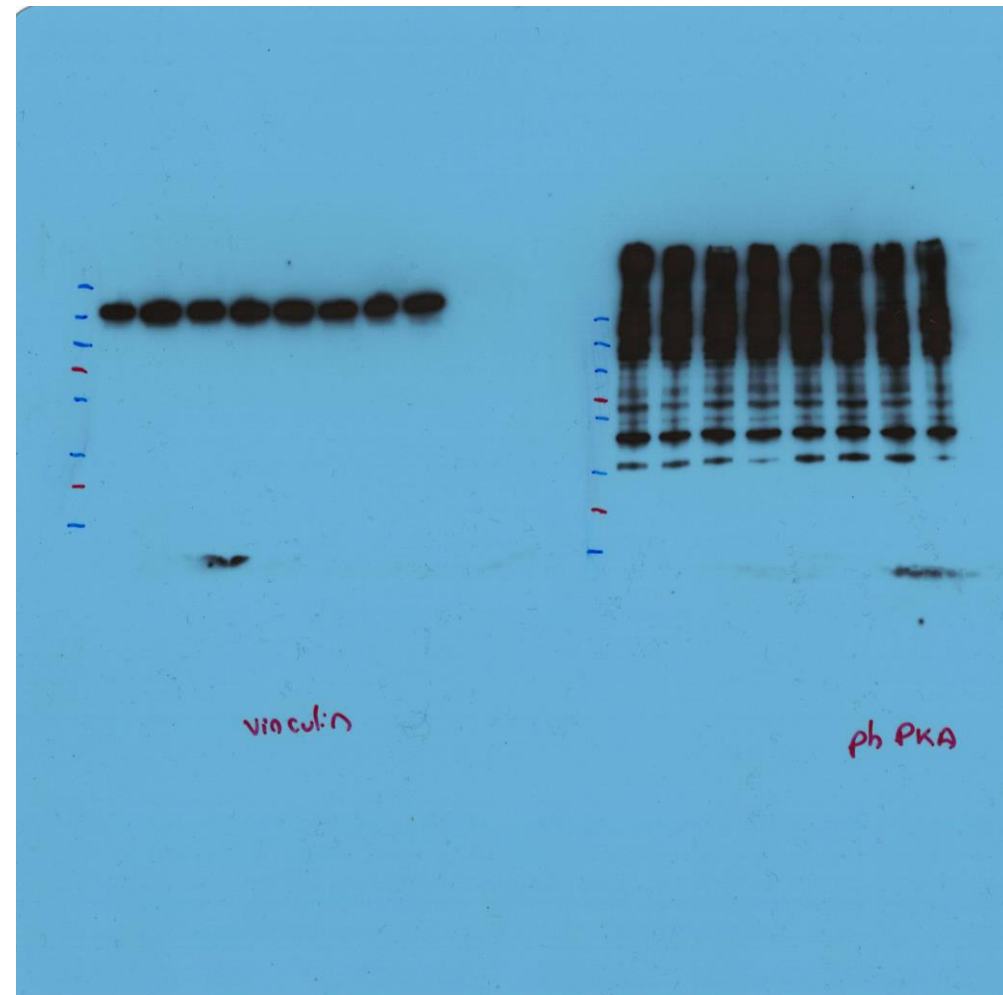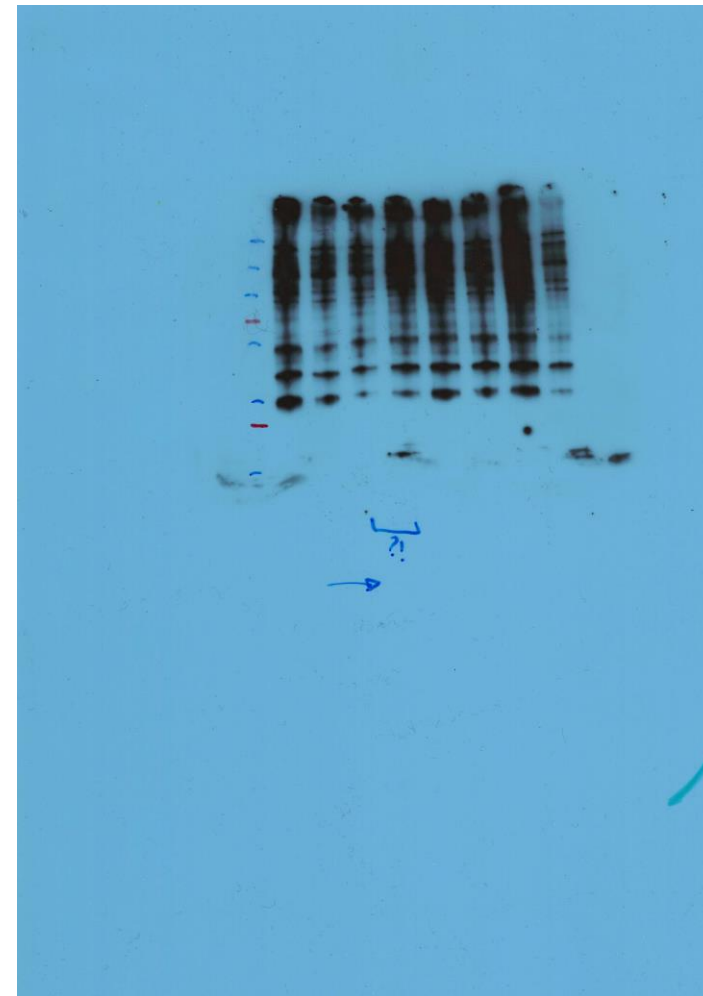

# Figure 5 F-G

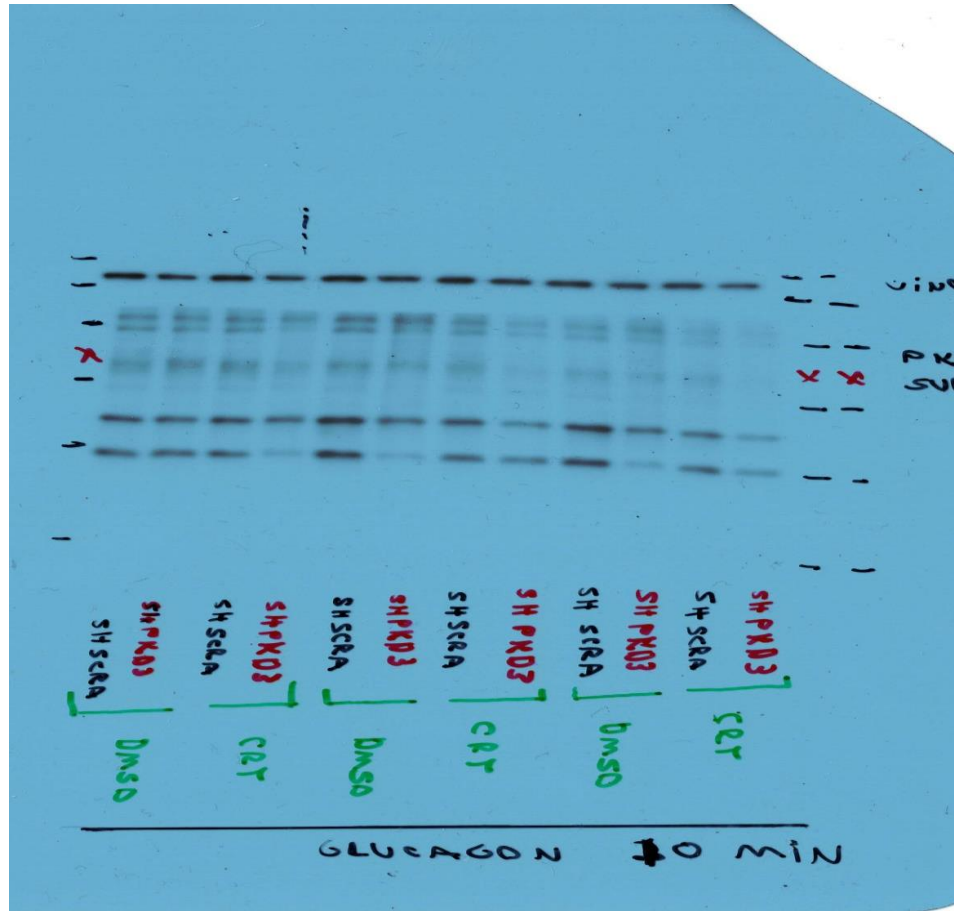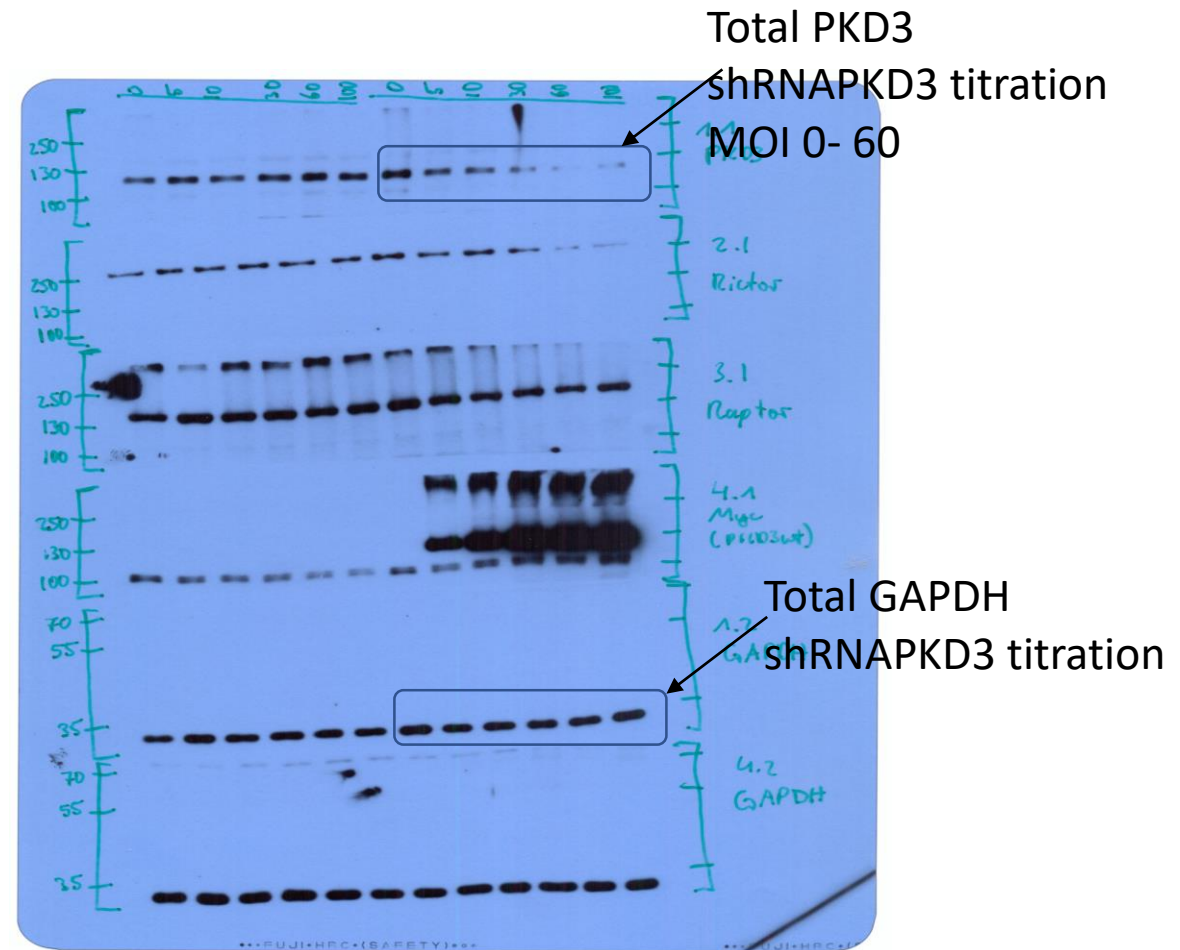

Supplement: LSA-2020-00863_SdataF4_F5.pdf [file LSA-2020-00863_SdataF4_F5.pdf]
