# Supplementary material for: A phosphoproteomic approach reveals that PKD3 controls PKA-mediated glucose and tyrosine metabolism
Source: Life Sci Alliance. 2021 Jun 18;4(8):e202000863. doi: 10.26508/lsa.202000863 (PMC8321662; doi:10.26508/lsa.202000863)
Supplement: Supplementary file 3 [file LSA-2020-00863_Supplemental_Data_1.xlsx]

## Sheet: Form
	Cancer Metabolism MS Unit: Sample Application Form									2019-10-15
	Customer:	Name:		Angel Loza Valdes				Experiment-No.:		GB-516
		Mail / Tel.:		angel.loza_valdes@virchow.uni-wuerzburg.de
		Research-Group:		Grzegorz Sumara
		Institute:		RVZ
				Josef-Schneider-Str. 2
				97080 Würzburg
	Scientific Background:	Aim of the Experiment:		Determine concentration of phenylalanine and tyrosine
		Target Metabolites:		Amino Acids
	Samples:	Date of Sample Submission:		2019-10-18
		Sample Source:		Mouse liver samples
		Extraction Method:		WatSolMet-SPE-C18
		Standards:		Lamivudine
	MS Analysis:	Date of analysis:		25.10.2019
		MS-Method:		LC/MS
		Evaluation:		Automated TraceFinder				Master Method:		WatSolMet_Pos / -Neg
								Batch:		191025_WatSolMet_Pos / -Neg
		Storage File(s):		C:/Data/Sumara/191025
	Organization:	Date of Result Submission:		29.10.2019
		Pricing:		28,- € per sample		("Collaboration Price")
				Total: 784,- €
		Date of Bill Submission:		not yet submitted

## Sheet: Sample_List
	mice #	line	sex		genotype	Liver	Sample	homogenize in		10 µM Std.
						[mg]	#	LM [ml]	(:2)	[µl]
	293	Tg(mPrkd3EE)4	M	Tg	negative	24	1	1176	588	480
	295	Tg(mPrkd3EE)4	M	-	negative	29	2	1421	710.5	580
	296	Tg(mPrkd3EE)4	M	Tg	Albumin-Cre	20	3	980	490	400
	300	Tg(mPrkd3EE)4	M	Tg	Albumin-Cre	22	4	1078	539	440
	301	Tg(mPrkd3EE)4	M	Tg	negative	26	5	1274	637	520
	303	Tg(mPrkd3EE)4	M	Tg	Albumin-Cre	25	6	1225	612.5	500
	304	Tg(mPrkd3EE)4	M	Tg	Albumin-Cre	21	7	1029	514.5	420
	307	Tg(mPrkd3EE)4	M	-	Albumin-Cre	24	8	1176	588	480
Missing:	308	Tg(mPrkd3EE)4	M	-	Albumin-Cre	28	--	--	--	--
	310	Tg(mPrkd3EE)4	M	Tg	Albumin-Cre	20	9	980	490	400
	314	Tg(mPrkd3EE)4	M	-	Albumin-Cre	25	10	1225	612.5	500
	315	Tg(mPrkd3EE)4	M	-	negative	21	11	1029	514.5	420
	316	Tg(mPrkd3EE)4	M	Tg	Albumin-Cre	30	12	1470	735	600
	317	Tg(mPrkd3EE)4	M	Tg	Albumin-Cre	20	13	980	490	400
	318	Tg(mPrkd3EE)4	M	Tg	Albumin-Cre	22	14	1078	539	440
	319	Tg(mPrkd3EE)4	M	Tg	Albumin-Cre	28	15	1372	686	560
	321	Tg(mPrkd3EE)4	M	Tg	Albumin-Cre	30	16	1470	735	600
	322	Tg(mPrkd3EE)4	M	Tg	negative	23	17	1127	563.5	460
	323	Tg(mPrkd3EE)4	M	Tg	Albumin-Cre	30	18	1470	735	600
	324	Tg(mPrkd3EE)4	M	Tg	Albumin-Cre	20	19	980	490	400
	325	Tg(mPrkd3EE)4	M	Tg	negative	27	20	1323	661.5	540
	326	Tg(mPrkd3EE)4	M	-	Albumin-Cre	26	21	1274	637	520
	327	Tg(mPrkd3EE)4	M	Tg	Albumin-Cre	30	22	1470	735	600
	328	Tg(mPrkd3EE)4	M	Tg	Albumin-Cre	28	23	1372	686	560
	331	Tg(mPrkd3EE)4	M	-	Albumin-Cre	23	24	1127	563.5	460
	332	Tg(mPrkd3EE)4	M	Tg	negative	30	25	1470	735	600
	333	Tg(mPrkd3EE)4	M	-	negative	24	26	1176	588	480
	334	Tg(mPrkd3EE)4	M	-	Albumin-Cre	25	27	1225	612.5	500
	335	Tg(mPrkd3EE)4	M	Tg	Albumin-Cre	31	28	1519	759.5	620

## Sheet: Method
	Analysis of WatSolMet in Tissue Homogenates	25.10.2019
	Based on RP18-SPE Extraction
	Transfer pieces of mouse liver into Falcon polypropylene round-bottom tubes (14 ml).
	Add 49 tissue-vol. of MeOH/H2O (80/20, v/v) (e.g. 10 mg tissue + 490 µl solvent)
	add 20 tissue-vol. of 10 µM Lamivudine in MeOH/H2O (80/20, v/v) (e.g. 200 µl per 10 mg tissue)
	Homogenize with Ultraturrax
	Transfer 900 ul homogenate into Eppi
	Centrifuge homogenate (2 min. max rpm)
	-> Activate RP18 SPE-column by elution of 1 ml CH3CN.
	-> Equilibrate RP18 SPE-column by elution of 1 ml MeOH/CH3CN/H2O (50/30/20, v/v/v).
	-> Transfer 600 µl homogenate-supernatant to equilibrated RP18 SPE-column
	(Collect eluate + "blow out" in Eppendorf)
	-> Evaporate eluate of RP18 SPE-column in SpeedVac.
	Sample preparation for LC/MS-Analysis:
	-> The evaporated samples were redissolved in 100 µl CH3CN/5 mM NH4OAc (25/75, v/v)
	and centrifuged for 2 min at max rpm.
	LC/MS-Analysis
	Tune-File: 180901_Tune_LCMS
	Instrument Method: 190919_WatSolMet_NegPos_ZIC
	For LC/MS analysis, 15 µl supernatant was transferred to LC-vials.
	LC parameters:
	Mobile phase A consisted of 5 mM NH4OAc in acetonitrile/water (5/95, v/v), and
	mobile phase B consisted of 5 mM NH4OAc in acetonitrile/water (95/5, v/v).
	After application of 3 µl sample to the HILIC column (at 30 °C), the LC gradient program was:
	100% solvent B for 2 min, followed by a linear increase to 40% solvent B within 16 min,
	then maintaining 40% B for 6 min, then returning to 100% B in 1 min and
	5 min 100% solvent B for column equilibration before each injection.
	The flow rate was maintained at 200 μL/min.
	The eluent was directed to the ESI source of the QE-MS from 1.85 min to 20.0 min after sample injection.
	MS Scan Parameters:
	Scan Type: Full MS
	Scan Range: 69.0 - 1000 m/z
	Resolution: 70,000
	Polarity: Positive and Negative, alternating
	Microscans: 1
	AGC-Target: 3E6
	Maximum Injection Time: 200 ms
	HESI Source Parameters:
	sheath gas: 30
	auxiliary gas: 10
	sweep gas: 3
	spray voltage: 2.5 kV in pos. mode and 3.6 kV in neg. mode
	Capillary temperature: 320 °C
	S-lens RF level: 55.0
	Aux Gas Heater temperature: 120 °C
	Data Evaluation:
	Peaks corresponding to the calculated amino acid masses (MIM +/- H+ ± 2 mMU)
	were integrated using TraceFinder software (Thermo Scientific, Bremen, Germany).
	Materials:
	Ultrapure water was obtained from a Millipore water purification system (Milli-Q Merck Millipore, Darmstadt, Germany).
	HPLC–MS Solvents, LC–MS NH4OAc and lamivudine was purchased from Merck (Darmstadt, Germany).
	RP18-SPE Columns:
	Phenomenex Strata C18-E, 55 µm, 50 mg / 1 ml
	# 8B-S001-DAK (100 EA, 150,- €)
	(Phenomenex Aschaffenburg, Germany)
	The equipment used for LC/MS analysis was a Thermo Scientific Dionex Ultimate 3000 UHPLC system hyphenated with a Q Exactive mass spectrometer (QE-MS) equipped with a HESI probe (Thermo Scientific, Bremen, Germany).
	Particle Filter: Javelin Filter for 2.1 mm ID (Thermo Scientific, Bremen, Germany)
	UPLC-precolumn: SeQuant ZIC-HILIC column (5 μm particles, 20 × 2 mm) (Merck, Darmstadt, Germany)
	UPLC-column: SeQuant ZIC-HILIC column (3.5 μm particles, 100 × 2.1 mm) (Merck, Darmstadt, Germany)

## Sheet: Data
	Abs. Peak Area	all compounds
	Compound	RT	Range		MIM	Mode	Blanks		293	295	296	300	301	303	304	307	310	314	315	316	317	318	319	321	322	323	324	325	326	327	328	331	332	333	334	335
		[min]			[Da]		Blank_01	Blank_02	Sample_01	Sample_02	Sample_03	Sample_04	Sample_05	Sample_06	Sample_07	Sample_08	Sample_09	Sample_10	Sample_11	Sample_12	Sample_13	Sample_14	Sample_15	Sample_16	Sample_17	Sample_18	Sample_19	Sample_20	Sample_21	Sample_22	Sample_23	Sample_24	Sample_25	Sample_26	Sample_27	Sample_28
	(Iso)Leucine	11.1	10.5	11.7	132.102	pos.	61724523	44936831	4895306420	6126412332	5620110685	6276869493	6249128882	5743497723	6398129073	6639968773	6306125816	6524780556	6513388136	8898825026	6919544086	7963669771	7095576179	7957139516	8410577511	7479385492	8247898272	9630216624	7852760672	11330349328	8095268145	11111598944	10205147771	10537800417	16407852912	10348217196
	(Iso)Leucine	11.1	10.6	11.6	130.087	neg.	1140508	1280389	1602539097	2019419023	1864142205	2077331476	2082988589	1977411141	2162244265	2309803439	2181224064	2238973915	2335135642	3148561662	2345807958	2718988234	2419517915	2629270700	3034534585	2623359269	2930310678	3734834051	2951683017	4684651337	3157835736	4741832932	4321055758	4510311092	7049030334	4296236597
	3-Hydroxyanthranilate	2.55	2.3	2.8	154.05	pos.	137654	114558	12172674	17377659	9842453	6336410	6963469	10664791	11187095	13132483	17489592	8365519	8432550	9515085	10409241	9751209	7100751	8662161	7594791	9718859	10425641	11252183	9065040	9843585	6458221	7213809	7590548	6912696	21323184	5907316
	3-Hydroxyanthranilate	8.65	8	9.3	152.035	neg.	291941	158024	1403986	2126594	1698145	2054270	2364846	2407636	3048264	2902434	2048403	3411614	2401904	3853736	3807318	3767740	3697170	3167380	2749186	3757551	3652809	2426841	3770486	3681816	3344520	5949734	6087327	6019982	5313624	7146743
	3-Hydroxykynurenine	11.5	8	15	225.087	pos.	4229471	4319751	327076	121203	70373	62799	84861	84846	61455	49698	51546	16791	60488	27831	76863	50655	77928	98004	45456	107736	108385	98042	74841	30697	118168	104031	74663	164125	130204	175984
	3-Hydroxykynurenine	11.95	11.5	12.4	223.072	neg.	0	0	5860965	6295475	6053586	5037769	4757092	4526395	4718213	6552142	5383489	6134800	5560588	6436264	7153110	7258679	7827747	5715093	7262262	8147930	7942763	8746820	6331883	8058732	5458128	13223412	7463554	14056780	19547021	13981916
	3-Phosphoglycerate	16.45	13	19.9	184.986	neg.	502318	402823	9918224	20589950	20371313	22340161	21501421	23558237	27288484	24923459	20197945	24948892	26252365	26263816	32767354	26864718	32474702	30931049	31920171	36065122	37023636	33062964	37886370	31445984	23371982	63323702	74214912	66692281	84498329	70198218
	4-Hydroxy-2-nonenal	2.15	1.8	2.5	157.122	pos.	180456	171855	404521	338987	181472	287165	275446	333869	327656	238706	223235	392213	332625	320414	286278	404131	323005	329253	293431	231571	336541	386812	343997	279919	344994	395757	356119	317009	362386	296270
	4-Methoxy-2-nonenal	2.3	2.1	2.5	171.138	pos.	119476	77374	5227375	4361295	3401322	5520656	4095803	5216870	6427948	3819127	4746265	8812920	5244362	5832483	6895008	5740824	5324077	4028567	4812710	4942000	6373199	7213298	5782868	3990965	9368916	6914079	4509657	8684647	9000422	4062256
	5-Hydroxyindole-3-Acetic Acid	10.75	10.2	11.3	192.066	pos.	0	0	7816158	12157986	6242990	8732592	11478171	11910455	12386426	4509427	6188537	10978345	14905737	13398538	7882245	9029546	7294304	7955491	8628318	6254355	10140288	12959528	18220240	11122197	12732887	17287766	22006232	10998837	23290350	10501516
	5-Hydroxyindole-3-Acetic Acid	5.4	2.3	8.5	190.051	neg.	0	8934	226346539	171924236	190318514	226423953	118188575	214064018	213623974	113027375	98483588	145897006	187814980	262061799	236505156	257054412	220267432	227505035	200431894	227520939	232799903	218867192	216662504	310710384	153092600	335672307	235397862	341771896	525998240	359829484
	5-Hydroxytryptophane	10.85	10.3	11.4	221.092	pos.	0	0	2576318	2948419	2946703	3075069	5049384	3793522	3657715	3982510	3769820	3877408	4422481	5467572	5039420	5958470	4939884	5346337	5816223	6263908	6056559	8151060	4198994	6955147	6201210	8744200	8328561	7698006	11354864	7593420
	5-Hydroxytryptophane	10.85	10.4	11.3	219.078	neg.	0	0	168849	180440	121287	259954	341503	247038	399058	304927	297255	293300	355256	496188	401793	483796	485459	511459	509451	636768	553968	871052	435009	806419	775629	1142667	1213746	851989	1846138	947634
	5-Methyl-THF	13.05	12.6	13.5	460.194	pos.	0	0	553159	1932048	1512587	1840143	4191526	4746710	2637524	7431972	4868150	1832096	3375303	3672552	3320737	4138468	4351019	6263152	8374140	7073825	4741856	8498171	4815596	9747464	3953120	5695764	6183883	4352104	8309950	4881902
	6-Phosphogluconate	17.45	15	19.9	277.032	pos.	0	0	366322	3792520	3511102	3523651	3947076	3522208	4218908	5526107	4821710	5401394	7183853	7024968	6636357	6755249	5899184	5117175	6653187	6272414	6810878	8581551	7719015	7212553	6656118	9496583	11375004	10529726	13865874	10644048
	6-Phosphogluconate	16.95	14	19.9	275.017	neg.	15957	10869	3276067	18506152	15321719	16356999	17627379	17345959	19249812	24108614	21122828	24793910	30540333	30737767	28261511	24150187	28537416	24437030	32642561	30453568	33444337	39134756	37690839	32892290	26592132	64134749	81084751	78607399	99555905	73510609
	AcAc-CoA	13.25	13	13.5	852.144	pos.	0	0	0	0	0	0	0	54006	0	38192	0	0	33079	33401	0	0	115871	60810	0	45223	32841	0	35588	185821	30173	303804	0	41532	181767	113590
	Acetoacetate	14.6	14.2	15	103.039	pos.	0	0	776392	955338	562167	841997	870220	856760	747680	1020385	530519	972379	1368929	1022605	870587	808494	838128	995925	1044482	635937	963407	751019	1229653	685840	479939	1315033	2270237	1411925	1532097	1124282
	Acetoacetate	12.25	11.5	13	101.024	neg.	8235283	10373869	293360866	348032141	348972312	388533562	376814540	396497215	450112152	418243924	372913153	377859190	372038428	467594244	486631581	504027758	560829813	537697967	572691852	660046631	620990176	430278930	468142011	477909640	364400325	746244894	780242651	782279392	1090820459	844082847
	Acetylglycine	12.35	12	12.7	118.05	pos.	201005	195469	3621955	3685803	3032749	4547231	3726481	4394407	4920393	5015072	2458411	6382371	6362607	4807647	4614633	3826410	4642817	5174078	4642661	3162815	3403735	4254780	5896871	3914042	4966348	7250153	11746666	7425819	8893123	5827267
	Aconitate	8.5	8	9	175.024	pos.	0	0	890249	2216765	1562976	994975	1001830	971328	1008321	867882	926286	796367	871122	984465	906973	876076	880410	918993	982479	945479	1025750	1043463	1009501	825398	1035257	1124285	1054324	1155039	1060941	1082894
	Aconitate	11.5	9.5	13.5	173.009	neg.	124572	92059	11312649	22348520	23265083	17597273	14258171	15876961	17596571	21358838	14285198	13543630	15604570	34074835	27043334	24687454	30164918	29051478	20375886	30498210	32336511	15071283	23540980	32693987	16355074	36611737	27249486	33944652	60932462	59159894
	Adenin	5.25	4	6.5	136.062	pos.	10755992	5416755	561265233	622643598	462013386	527018882	492962586	556882342	585211738	495083393	434882444	534984846	596353898	646048714	498465144	591399754	561263846	548837691	586565695	649356870	686766119	514167722	651644494	867521002	652035967	689560386	1040177518	682689875	1240464643	718243558
	Adenin	5.75	4	7.5	134.047	neg.	3037619	872783	108369628	129444205	103749061	123032185	114449959	122237300	131380489	109768600	88513651	108307005	114858018	124948681	107296933	129151136	101318497	106134009	98487494	125552667	125270097	83519321	114410939	158402694	103880968	163142017	244611533	170095606	237298360	184601201
	Adenosin	5.5	4.5	6.5	268.104	pos.	352342	80009	463494993	568420637	457994699	837338318	580343117	660417906	793078702	661887431	486184210	532595463	654460207	679321529	783070539	951981289	847427629	814839716	884266803	1266826148	1010773970	726896911	523085091	897123661	804671324	917254564	1010880732	881926804	1331257645	975206491
	Adenosin	10.55	10.2	10.9	266.089	neg.	0	0	5404742	7057290	6060788	6469845	7314056	6052380	7258465	7605934	6474467	7436850	6995773	6892791	6598040	7399482	7141575	6684612	6916873	6517656	7250815	6914231	7636250	5778159	6375522	8841267	10559581	8948427	9802008	8841287
	ADP	14	13.4	14.6	428.037	pos.	18	9684	2146126	5236318	4948603	6737961	5071795	8251104	6963513	6786071	3884002	5665139	6158038	7273908	7517469	8808827	7264366	7258218	7104193	8669203	8395990	9392291	5835410	9918739	8731840	10594560	10633376	10152988	17830887	10453486
	ADP	14	13.5	14.5	426.022	neg.	0	0	691955	2255534	2064984	3010409	2071308	3883346	3230068	2818785	1679334	3008013	2836980	3591131	3883629	4745195	4416175	3660681	4197470	5271124	5113912	5227918	3234494	5710228	4660857	8096668	7128035	7523456	13653509	7882261
	a-Ketoglutarate	14	13.5	14.5	147.029	pos.	0	0	1632592	1015909	1472179	1309633	838770	1447071	845424	566750	617568	965215	981317	1085593	1113290	825582	878877	1138489	733116	1094481	950019	1475835	1109807	2418992	1802270	1163225	433838	993771	1431487	1850684
	a-Ketoglutarate	13.05	12.7	13.4	145.014	neg.	359257	76609	4936982	18191919	10941470	17834965	53178861	37574996	41152989	82958387	65729475	61832186	64933212	45662546	52642431	41776182	49054309	57213164	52684062	91666226	79847614	60399620	58703703	44108873	64553486	149861747	235161520	111951735	118840229	126757519
	Alanine	13.5	13	14	90.055	pos.	11339897	12012092	865346781	1021214008	974114081	1105379261	1160680962	1140147666	1259663716	1044361085	1022446729	1185714204	1302626379	1568259744	1267853769	1354521515	1472712482	1448316237	1423415024	1492979289	1407886885	1573340779	1899816521	1795466428	1486904106	2643338438	2396657416	2202645942	3466206386	2057490627
	Alanine	13.6	13.3	13.9	88.0404	neg.	160354	100554	204861145	248709309	249618399	275838339	284516150	259159131	325429443	270706665	286393762	319206699	402073121	491121068	371692555	367672995	496580633	569393139	577687620	518884145	527859170	638595806	794064332	770025765	623319939	1173279459	1090419323	1022741689	1569860344	912427753
	Aminobenzoate	12.5	12	13	138.055	pos.	553667	432411	158215300	190411483	175254422	138627358	141587966	130103915	160634796	97939255	66272998	198282954	150502105	200441180	230331241	189128659	255032220	204368282	176639962	192726070	273948703	109052691	340866730	168798218	147908599	237627003	179518830	250878886	328522842	389666336
	Aminobenzoate	2.2	1.9	2.5	136.04	neg.	232990	81782	14565704	27143921	8469050	12226851	28731207	19684996	22626001	12164138	17061541	34193304	56386343	39915706	21752514	18487126	20734888	17324058	23682004	17321258	36270051	36653004	91893003	31571716	65591965	74642954	118021950	57232055	83920082	44176509
	Aminobutyrate	14.9	14.4	15.4	104.071	pos.	5278467	4201267	305534362	342950806	291175967	325378053	391166764	359512581	388493992	394194318	446511651	427672623	405287584	488572548	396549517	375776902	439200810	413517381	492209814	414603981	490903783	571504411	455179242	399235608	515170057	828084643	743663255	671217020	775286861	798321278
	Aminobutyrate	12.9	12.5	13.3	102.056	neg.	0	0	19206021	33737192	15944636	17409789	24611120	14732543	19323461	17111403	14331921	39730992	88207520	36612281	20919074	20078877	27001158	21366799	26625133	20111782	27002243	26788463	51971568	40449553	46647983	67759685	142082369	63122359	75093690	48947906
	AMP	12.98	12.7	13.25	348.07	pos.	1332971	470052	5299018	7535231	12640987	17571582	17854438	20213141	13846886	23265391	21936890	17568950	23826547	29347219	28572764	35349457	20465110	29541988	29846901	34637372	26047601	51409033	12237387	35471185	18915600	30350806	28227816	31924946	41642232	45452016
	AMP	12.98	12.7	13.25	346.056	neg.	156751	21834	1873645	3211389	5823005	7138685	8805660	10265856	6669736	11341336	11665242	9413145	11885673	15188198	15639489	17603408	11022320	16204020	17079376	18914895	14881222	31157446	6574264	20940243	11284199	20094660	17241553	21025085	27919726	26463986
	Anthranilic Acid	12.5	12	13	138.055	pos.	553667	432411	158215300	190411483	175254422	138627358	141587966	130103915	160634796	97939255	66272998	198282954	150502105	200441180	230331241	189128659	255032220	204368282	176639962	192726070	273948703	109052691	340866730	168798218	147908599	237627003	179518830	250878886	328522842	389666336
	Anthranilic Acid	2.15	1.9	2.4	136.04	neg.	194395	60114	14340098	26824735	8315713	12012721	28330071	19499485	22321778	11940315	16816074	33798930	55880642	39404897	21554806	18275744	20504216	17175842	23504567	17149369	35862484	36270113	91078976	31236252	64752827	74004508	117020759	56527091	83214111	43676308
	Arginine	12.25	11	13.5	175.119	pos.	41989133	15758502	3770238	3043814	2107134	1272982	1359801	1005131	714113	562799	712672	471703	365057	197268	471752	339509	255124	366569	624638	387537	319822	310132	175405	75682	180806	542573	148964	169954	74728	284954
	Asparagine	14.5	14	15	133.061	pos.	3693671	1643862	63457554	67025197	85576787	77079282	60935604	68328705	96084409	68871208	80856384	63265510	56774877	133236174	112342497	146023404	120732071	110343793	112193185	100943404	96977943	156998103	101781467	246940099	84875507	111798459	91957519	127322351	294107091	122295002
	Asparagine	14.55	14	15.1	131.046	neg.	54423	40735	21231595	21938250	27796017	25994555	19586095	23035746	29852695	22269143	26974036	21662793	19809300	42248140	39143271	46314870	47735304	41719378	47279086	41516639	37081000	59425237	44640115	91923469	34405028	49528910	43545635	56443386	112751194	58028983
	Aspartate	13.9	13.3	14.5	134.045	pos.	2156585	1449577	161474029	214773003	188778718	218486256	245863883	197564648	225241804	268290996	255410585	242285354	291096492	367965458	240836019	277212828	275760844	306214073	363473702	283983664	362158500	490423685	389609762	543517413	479993245	497073546	414568964	451345650	590639309	474619899
	Aspartate	13.75	13	14.5	132.03	neg.	1533538	649131	394580299	402894544	384813149	384068738	401256891	372213533	368065196	414191242	467784090	451284584	476162381	563336195	393493180	435821309	513447843	534315891	685345252	505591421	640656310	910019903	744445186	1018471285	891484917	1028622660	859142445	1003471336	1287006626	1119108919
	ATP	17.45	15	19.9	508.003	pos.	10965	3579	100564	633168	546827	807104	575119	884899	1136534	902707	556482	1051431	1025481	1232769	1278244	1629158	1355047	1178510	1251105	1257508	1209694	1549836	1078386	1309813	849263	925058	1100995	917517	1198179	1141835
	ATP	17.45	15	19.9	505.988	neg.	0	0	0	12968	0	0	10938	0	24185	0	16740	51076	20067	72042	48551	35318	35039	53006	11185	0	2093	36457	0	28927	23390	22681	46389	0	95364	12096
	Betaine	12.3	11.8	12.8	118.086	pos.	59965228	59405827	6155786631	8771374934	6014495973	7959210668	8447612352	7101655422	8324959771	7354204753	5570576866	9651546024	9929086966	10425591533	8419622473	7877880194	7867674081	9773028844	9166895520	6991937224	7463371915	6807824658	10958758468	9490117941	6937973016	12948701554	18864924086	12771443872	17154774015	11066295369
	Betaine	12.1	11.7	12.5	116.072	neg.	327162	468145	243182208	304389206	264762671	324540649	311014194	283898448	323877700	335620316	316573656	357227714	393767316	508546582	364347386	401242280	393826513	401487895	513563510	417740551	456618247	628444906	556182455	834202652	618380776	792050566	837800514	778275438	1156923980	730903299
	Biotin	10.5	10	11	245.095	pos.	2466746	2239558	15556919	24464603	14758682	13330146	21913980	13176860	16649585	24264822	15585642	27844522	28950275	19449698	13851778	15352737	21890587	13738483	18111283	12885693	29072642	18925692	31206666	30128425	44908410	42203206	48211928	28935306	44725713	31096224
	cAMP	9.95	9.5	10.4	330.06	pos.	0	0	3228757	3297048	1156350	1385622	1140224	765740	925275	614481	491477	464126	315653	305930	247113	295160	109046	118728	117057	80744	39503	104335	58002	112300	88257	45751	59653	47755	35921	16443
	cAMP	10	9.5	10.5	330.06	neg.	0	0	3233590	3297135	1177828	1385809	1164189	765790	925526	617516	491477	485726	364159	311077	265813	305816	123186	118728	134654	87370	61513	105118	78013	126983	127023	50343	101040	92388	75040	34409
	Carbamoylaspartate	12.5	12.2	12.8	177.051	pos.	0	0	126470	29613	8712	17576	17720	22811	63167	0	8651	0	0	0	0	0	14097	0	0	67770	68429	17866	15617	0	7474	0	0	0	23257	0
	Carbamoylaspartate	13.55	13.2	13.9	175.036	neg.	0	9139	1033788	1609244	1483346	1384680	1122579	628076	977175	103671	71100	1280169	969243	1712487	1081266	1672921	1189747	1008282	550827	993031	937064	184755	2299225	635320	524907	3333560	1782124	5845085	5728220	6326579
	Carnitine	14.75	14	15.5	162.112	pos.	1665805	1551701	5022599792	6031878727	5043108971	6013933905	6035639417	5843937435	5980185821	5669116445	4155220744	6894336905	7872812300	6975539436	6138746102	6293416508	6448337873	6328555919	6443655381	6073280630	6158893750	4958523894	7061860173	5804086339	4818313657	10530438873	13973028185	10173955463	13177442063	8861334743
	CDP	14.8	14.4	15.2	404.025	pos.	0	0	8512	49345	54383	53992	34977	61386	63270	68246	38634	34074	16220	79022	121447	120961	46078	70454	47154	128035	125384	158072	34527	32627	7807	31538	72138	35104	97486	61408
	CDP	17.45	15	19.9	402.011	neg.	0	0	0	9441	19339	55749	12430	19197	0	11467	0	10920	11509	11130	25794	18141	28589	3588	10459	0	55303	21724	0	0	0	49875	0	0	86490	40528
	cGMP	12.25	11.8	12.7	346.055	pos.	0	0	2205698	2224795	904729	1136349	673191	383330	679064	553526	385606	517137	198141	111452	62891	142611	0	33824	27123	0	30771	0	23452	33104	0	0	39122	0	0	38598
	cGMP	12.15	11.8	12.5	344.04	neg.	0	0	509111	453386	111079	199156	83287	75841	98721	0	29225	73860	0	62991	0	25745	0	0	0	0	0	0	0	0	0	0	0	0	0	0
	Choline	16.25	14.5	18	104.107	pos.	1567070	1972029	3401530923	3503411709	3166379138	3740441411	2815105701	3169673507	3473069366	3067545009	2741764378	3088029718	3637626175	3800989243	3771411308	2899048671	4128880733	3988063834	3622995979	3795225040	4202474916	5055322715	4429084269	7112584897	5293057604	5242359840	4164351902	4984297216	7805050607	5189856199
	Citrate	11.75	10	13.5	191.02	neg.	11215	23943	127445121	187437579	199167418	209465419	195755046	181927154	177352270	219587088	200634067	252684587	272236849	329261768	333209019	309087354	354229355	304623056	339691470	364063154	421845215	430190401	306348152	435362807	544287189	793570994	622007032	665068392	1064502499	757081711
	Citrulline	14.5	14	15	176.103	pos.	5951973	4221493	90134512	112795271	70863966	90141349	99268447	83449202	79306896	73630663	80175118	94795031	84744046	94088007	98023482	96113221	76391287	80225082	110133728	72273999	104461262	57251784	139245825	60351211	88504733	147499121	136408499	139138554	157363041	123309145
	Citrulline	14.7	14.2	15.2	174.088	neg.	0	0	4006686	5443002	3300391	4247408	4345456	3775483	3931994	3363185	3935669	5215354	5420961	5251904	5422724	5096666	4774345	5555147	8444278	4395238	6058715	5791996	12315757	6865798	10897001	11051661	11750910	9839213	11080039	8090955
	CMP	14.1	13.7	14.5	324.059	pos.	29822	4736	15080095	16984419	14719329	21282933	15449179	16961614	25583952	22645963	15489801	18846076	20802202	23483898	26575555	26071554	24939762	23239158	22971761	27871068	30145291	30413287	16116206	24187754	27267603	31169682	30139906	36331698	49840603	35477063
	CMP	14.05	13.5	14.6	322.045	neg.	0	0	5971532	6533326	6474042	8449884	6069060	7371152	10856085	8369650	6499797	8300480	8558014	10099564	12020271	12527077	13761960	11931754	12211461	15366438	15882874	16766421	8087361	13448563	14539722	22999827	20537091	24227649	36299798	26801116
	CoA	13.3	13	13.6	768.122	pos.	0	0	1891577	1738580	2739607	2433875	2023352	1400980	1689591	2287485	2067939	3062266	3520215	2770364	3775807	3112250	4496699	3096684	2731486	2869991	3363466	4827665	4092147	4791252	4993367	3749576	4771209	5120259	7859264	4437809
	Creatine	13.65	13.3	14	132.077	pos.	2928822	3413563	1781532687	1733397479	1619184619	1437178823	1648207139	1449677636	1542704661	1659894631	1638479789	1721893541	2697961840	2037993232	2128987622	1768042817	2065142579	2799914884	2176894258	1864086705	1987751515	2029704493	2226215943	2716567376	2276326711	3869950815	3970258745	3105520153	3801744169	3256039869
	Creatine	13.65	13.3	14	130.062	neg.	0	0	5632033	4682665	5507984	3998055	4535516	3500762	4200393	4355831	5029862	5687728	13283029	6588377	7754539	5733954	7781127	15205431	9262689	7253848	7382754	9110746	10777598	15371435	13526709	14938574	16861943	11891167	13721010	12669190
	Creatinine	9.1	8.6	9.6	114.066	pos.	1481632	1136582	96667302	111173943	96893529	85566275	88464754	95252840	115096531	110923860	108714761	107052049	120519334	151136800	192775034	154262037	179723811	214687061	196057614	212114190	207741468	199186693	167569290	238803022	211608760	204464513	221340608	215864801	356561287	207845633
	Creatinine	9	8.5	9.5	112.052	neg.	0	0	1814596	2079726	1388639	1212279	1386032	1328738	1495971	1843279	1955631	1944914	2229579	2062743	3039390	2082041	2544514	3192677	3348755	2574505	2895370	3048324	2545318	3825383	4096912	3418549	4181653	3583711	3810376	3737815
	CTP	17.45	15	19.9	483.992	pos.	0	0	0	0	0	0	0	0	0	0	0	0	0	0	0	21642	6193	0	0	0	0	0	0	0	0	0	0	5190	6151	5824
	CTP	17.45	15	19.9	481.977	neg.	0	0	0	9205	0	0	0	0	0	0	0	0	0	0	0	0	0	0	0	0	0	0	0	13972	0	18642	0	0	0	0
	Cystathionine	16.85	16	17.7	223.075	pos.	17764	6381	22195453	20272610	26415973	23309393	24677440	22650016	20345712	24597255	29803753	27648384	18698202	32450096	31946160	26629681	25256857	26905028	24990116	25802101	33299320	28110275	40493983	44286920	19638485	38505002	20405898	28968474	50983134	34540083
	Cystathionine	17.5	16	19	221.06	neg.	0	0	3272817	4409802	5397431	5635529	6354996	6563379	5448209	7508305	7823608	9019149	5413544	11463274	11021160	7384793	9627939	10322337	10894323	11283036	14251383	12062960	19043316	21036691	8415776	24994024	11893390	18370324	34999091	21230150
	Cysteamine	13.1	12.7	13.5	78.0372	pos.	0	0	26595	82202	133723	207641	202941	196308	160468	468398	102337	146621	159700	242801	182195	174644	251934	202664	261253	376741	319760	409330	509425	1258303	482760	687484	412036	498115	1035149	824246
	Cysteine	13.4	12.8	14	122.027	pos.	40023	32759	4306726	10614264	10715045	11186281	11708804	13668786	14527460	21001003	10984314	14028510	20789645	33570705	20149822	22299084	22051228	24700808	34227905	32578597	32283176	27457384	40662704	68990239	24441225	58329713	47161766	54538936	123046217	54165905
	Cysteine	13.65	12.8	14.5	120.012	neg.	0	0	2280983	5575891	5963734	6636075	6199383	7555764	8620078	10718800	5905304	8126840	11499066	19213241	11461179	11766114	13035746	16105164	23041178	20927714	19506092	17518500	27191305	42736385	16033966	36155865	30491029	35250685	75817683	34063854
	Cystine	16.6	15.5	17.7	241.031	pos.	834026	150164	5467864	2203287	2792891	2090391	1568312	1508677	1415191	1638043	2388015	983344	1785303	1384591	754038	714436	593449	718090	986125	1093803	541404	2295040	1454272	3111677	2105845	761656	573470	614780	448265	376952
	Cystine	16.5	16	17	239.017	neg.	0	0	315293	74665	55155	37670	27903	52864	65006	119010	164689	37421	147902	92351	43232	55592	26359	39461	204290	54937	48262	403349	226031	747825	325109	368164	230223	95602	257723	111165
	Cytidin	10.5	10	11	244.093	pos.	54581	6858	145308783	229638467	136859897	121520126	212648057	120864943	157188988	239377490	148998036	261132304	279856591	188140800	132235427	141911830	207119863	130151818	181044604	123041433	293416193	191057030	309900097	310830447	450331133	427551095	487240882	289380232	469393156	311213590
	Cytidine	17.95	17.4	18.5	242.078	neg.	2170	0	21274121	88153670	51907810	56664664	76100264	78107015	56286120	107675780	37701910	85121291	37464342	87099230	96548846	69006192	83323753	123688909	102831436	76451526	91394182	73358225	206615381	93848216	112907856	289370378	175720398	210680807	452856720	225428888
	Cytosin	3.75	2.3	5.2	112.051	pos.	2244468	2651299	1876659785	2188752228	2053966355	2155906161	2241039578	2237353190	2232931214	2283664014	2282919283	2405745871	2408514303	2542680236	2561200584	2575204350	2501887239	2366659185	2538249375	2525756044	2810905059	2824498407	2817459970	2695053950	2699713996	2862621841	2937539522	2920459542	482081082	3592021442
	Cytosin	10.75	8	13.5	110.036	neg.	1758916	4999315	4080614	5716921	5627717	6382504	7295961	6465654	6209582	6491865	8503832	7996032	8962301	10041810	10500900	11493099	6319311	7101450	6504679	5869948	6918104	6938027	7056930	6427128	8100631	20874847	22629617	21473643	14201303	22323288
	dAdenosin	3.75	2.5	5	252.109	pos.	18082	0	18156147	19056889	7421941	8791550	7117160	4934901	6022318	4931421	4460408	4251778	3545905	2656320	2598705	3178851	2535425	1643385	2421945	1240838	1068437	630644	1160166	925270	1056459	1531886	1772900	1210927	4225558	447311
	dADP	13.5	12	15	412.042	pos.	0	0	0	0	0	0	0	0	0	0	0	0	0	0	0	0	0	0	0	0	0	0	0	0	0	0	0	0	0	0
	dADP	6.25	5	7.5	410.027	neg.	5545	0	79412	60322	29312	53470	19809	86980	81489	30862	37242	0	14660	27629	13950	60883	71637	21873	8260	22411	18445	19538	35556	46120	8222	238	587	73793	45413	40441
	dAMP	13	12.5	13.5	332.075	pos.	0	0	57648	147770	45278	75169	153194	124001	127940	219080	198769	200256	261387	257770	164409	195411	276404	225955	355079	265300	274864	247896	231548	406328	515207	837016	694566	458819	836546	443392
	dAMP	5	4	6	330.061	neg.	0	0	0	0	0	0	0	0	0	0	0	0	0	0	0	0	0	0	0	0	0	0	0	0	0	0	0	0	0	0
	dATP	17.45	15	19.9	492.008	pos.	0	0	0	0	0	0	0	0	0	0	0	0	0	0	0	0	0	0	0	0	0	0	0	0	0	0	0	0	0	0
	dATP	17.45	15	19.9	489.994	neg.	0	0	0	0	0	0	0	0	0	0	0	0	0	0	0	0	0	0	0	0	0	0	0	0	0	0	0	0	0	0
	dCDP	8.25	8	8.5	388.031	pos.	0	0	0	0	0	0	0	14767	0	0	0	0	0	0	0	0	0	0	0	0	0	0	0	0	0	0	0	0	0	0
	dCDP	6.25	5	7.5	386.016	neg.	0	0	0	0	0	0	0	0	0	0	0	0	0	0	0	0	0	0	0	0	0	0	0	0	0	0	0	0	0	0
	dCMP	8.75	8.2	9.3	308.064	pos.	0	0	17997	102293	15524	29898	36741	23961	26990	3773	25079	21304	4653	0	0	0	4637	0	0	5993	0	0	6122	5017	5895	0	14370	13809	0	8044
	dCMP	9.95	9.4	10.5	306.05	neg.	0	0	9932393	12246012	10929600	12264529	11922240	12336441	13521204	16542236	11749278	14406822	11581686	13196351	15462748	14430988	15172880	13328737	15305983	15940726	15216874	12678047	8993202	13814190	9722672	20621714	23745286	21177292	24351233	21171388
	dCTP	17.45	15	19.9	467.997	pos.	0	0	0	0	0	0	0	0	0	0	0	0	0	0	0	0	0	0	0	0	5207	0	0	0	0	0	0	0	0	0
	dCTP	10.15	9.5	10.8	465.982	neg.	0	0	107373	78905	129852	97788	122458	83508	93092	50339	108439	150415	83626	59886	35861	41184	91665	58727	61032	67289	31739	88906	88472	100101	89992	61642	92949	69131	195552	107790
	dCytidin	12.5	12	13	228.098	pos.	173409	110398	1830872	1861865	2541738	2950571	2198299	2939169	3086812	2410791	2913485	2677932	1839725	2452942	2814039	3040923	3015290	3009655	2573559	4914150	3950019	3262434	3447012	4592871	3741658	5707408	3354441	5606621	7522759	5124225
	dCytidine	5.65	5.3	6	226.083	neg.	0	0	0	0	0	0	0	0	0	0	0	0	0	0	0	0	0	0	0	0	0	0	0	0	0	0	0	0	0	0
	Deoxyadenosine	3.8	2.6	5	252.109	pos.	18082	0	18109593	19022563	7387232	8779875	7108023	4930789	5974061	4905838	4417631	4246832	3539979	2642868	2596426	3171066	2529584	1643385	2420073	1237565	1067558	630644	1158050	924980	1055407	1530779	1771583	1208262	4165758	447311
	Deoxyguanosine	6.2	4.4	8	268.104	pos.	983509	331727	843515577	928280133	798385086	1402222584	929870729	1048938854	1295361910	1034035360	821754131	808399551	986599610	1044783655	1217882263	1480832572	1309967555	1290485928	1337202564	1960321568	1508593683	1125917328	786627921	1292273994	1185198009	1328890990	1461224988	1339597396	1906698211	1467339322
	Deoxyinosine	5.5	4	7	253.093	pos.	0	0	2061391	2747880	2395753	2548236	2522555	2561801	2524854	4278864	3568017	4043032	4611983	4927417	4539246	4488681	5786567	3814194	5041870	4811841	6439859	7816925	5177367	7557231	7445190	6886703	6127008	6474655	11544689	6450765
	Deoxyribose-phosphate	12.5	12	13	215.032	pos.	0	0	241688	422100	336650	213613	275286	423310	449220	300465	379904	224731	228042	281802	391319	284995	467206	314675	331296	452588	327368	387862	202910	155181	205636	430703	368890	250592	796183	372180
	Deoxyribose-phosphate	10	9.5	10.5	213.017	neg.	0	0	3587627	3719940	3877888	3978610	2935576	3533572	4239598	3065027	2654499	2924588	2893926	3971252	3536733	3672985	3817543	3204814	3778419	3851905	3631373	4195994	3531562	6915201	4992729	5167857	5220666	5718065	10348449	5151005
	Deoxyuridine	13	12	14	229.082	pos.	24406	0	0	0	0	0	0	25769	6627	29960	38918	0	16581	52402	0	36496	0	6253	12483	7633	35975	11018	1481	25084	0	132863	81062	176481	111416	271818
	Dephospho-CoA	11.8	11.3	12.3	688.156	pos.	0	0	6161047	9380478	12644113	13846380	7391266	13051790	13822560	11136940	7342479	8607146	8924284	18536304	17083051	22861887	14383027	17734604	16958376	17773027	15272581	11612237	8010821	22821516	6381887	16220936	12765809	14855217	31857472	20090029
	dGDP	14.95	14.6	15.3	428.037	pos.	34604	146358	1966656	3112238	3259314	3778506	3042157	5053530	3583508	3506657	2734952	2984760	3396771	3521646	3480997	4024760	3241608	3551170	3372785	3606225	3395535	4856909	2985454	4498443	4509060	4069887	3615688	3818999	4458799	3683032
	dGDP	15	14.5	15.5	426.022	neg.	28	0	1338946	2300691	2328305	2770849	2148673	4308589	3248423	2764083	2258809	2626011	2659175	2697709	3092744	3189685	3681688	3442365	3240107	4002164	3592863	4677002	3123394	4475297	4115611	5512284	5093900	5333574	6750162	5999618
	dGMP	13.48	13.25	13.7	348.07	pos.	1959876	1671118	31237746	25301855	29586667	57603134	25727193	34940202	47972758	29712936	26172839	22153869	25421751	32847916	49606224	54726256	34692724	43180972	33128755	51569785	34170712	38371550	18456501	31443254	26722242	37990678	39056888	40911038	52577904	41928933
	dGMP	13.38	13.25	13.5	346.056	neg.	467001	24789	4861935	4640273	5898146	11487849	4266568	6695471	9989665	5982586	4868855	4507864	5428787	8363035	12074003	13579100	9488448	11336336	9299027	13649459	9972709	11090102	5050146	10947873	8926540	14348154	14651205	14796787	21429899	17547976
	dGTP	18.45	17	19	508.003	pos.	10965	3579	95301	516647	460991	673042	459462	678292	913477	656280	446033	834702	811737	856971	874938	1052497	1047163	801568	879887	904764	876988	1018336	800214	805992	475889	632064	791595	720164	819664	697511
	dGTP	17.45	15	19.9	505.988	neg.	0	0	0	12968	0	0	10938	0	24185	0	16740	51076	20067	72042	48551	35318	35039	53006	11185	0	2093	36457	0	28927	23390	22681	46389	0	95364	12096
	dGuanosin	7.5	6.5	8.5	268.104	pos.	1087035	463560	398820395	373959211	352503135	584641735	362153170	403667289	521962476	387381326	346774457	286109835	345744998	378077734	451577390	546876362	475989099	491034273	465772218	715600316	511336383	409846560	270179972	403211751	389786266	420391017	458726083	470446180	585708875	506353931
	dGuanosine	11.45	10.9	12	266.089	neg.	0	0	3564530	4976971	4122435	4677658	6135619	5396679	6174745	6187643	5197214	6017411	5851759	6225400	6746718	6801138	7535072	6463017	7018493	6960390	7809618	7272732	7988608	8095210	7337755	10481493	13977679	9932794	15084328	9713130
	Dihydrofolate	13.5	13	14	444.163	pos.	0	0	119269	117898	98370	56954	67505	16760	47343	38709	102615	173997	190935	167848	47238	27158	72924	53560	66287	0	53723	219514	42706	74988	276627	200573	118467	279932	90923	58530
	Dihydroorotate	12.5	12	13	159.04	pos.	12569	0	0	0	9442	0	0	10555	0	0	0	0	0	21246	0	0	0	0	0	0	0	0	0	0	0	0	0	0	0	0
	Dihydroorotate	11.5	11	12	157.025	neg.	315343	244551	1529624	2038541	1693665	1586897	1024127	743956	966004	348635	494465	1133924	929779	1581641	980948	1553714	803374	753672	487475	661105	683804	452949	2205986	718437	659785	2036415	1335392	3361535	4407476	6202251
	Dihydroxyacetone phosphate	14	13.5	14.5	171.005	pos.	0	0	179561	205064	154739	519994	95530	251583	681476	131528	16819	33375	30337	88579	677353	527043	189888	454997	41717	536229	123424	16718	29431	0	0	156479	101330	111684	119950	164792
	Dihydroxyacetone phosphate	14	13.4	14.6	168.991	neg.	0	0	10190390	8570401	9095383	16225272	5319102	11494953	19470458	7263092	2668978	3476399	2076848	5996381	20788582	17982163	10858479	18521492	8566956	23738208	10855861	5869771	4035495	3216117	2171903	11409024	8813959	13485855	15086062	20111833
	dInosin	8.5	8	9	253.093	pos.	0	0	6314481	6083192	1872819	2849089	2218080	2836867	3354863	3672768	2906947	3292259	3020940	3338026	3412126	3393691	3648084	3159025	4574355	3442804	3435155	3804043	2672192	3254463	3295200	5039975	4160309	3866214	5791239	3403372
	dInosin	6.7	6.1	7.3	251.079	neg.	0	0	4466479	6965390	9570428	8674214	8299847	9148754	8621588	19848423	13371658	11349128	12473273	16921037	19075335	21264487	20507463	13557635	22904582	18234251	22854716	36263606	17446685	32069498	33622138	43217325	29008769	38838323	92314470	43430624
	Dopamine	5.25	4.5	6	154.086	pos.	467527	176602	820860	884174	841325	1005091	996634	1020186	1067705	1141748	1015806	1180234	927026	1733647	1414703	1449015	1460344	1518654	1546064	1678044	1939577	1804893	1607810	1847360	1677282	1948532	1309300	1554897	2772600	2456973
	Dopamine	3	2	4	152.072	neg.	52593	0	94359	163504	45237	51843	59964	107771	64719	66072	67412	35181	50495	73212	41051	108485	104840	75972	100227	61116	126569	85902	127942	89908	79856	159005	84918	39606	237171	51656
	dTDP	12.5	10	15	403.03	pos.	0	0	0	0	0	0	9134	0	0	0	0	0	0	0	0	0	0	0	0	0	0	0	0	0	0	0	0	0	0	0
	dTDP	6.25	5	7.5	401.016	neg.	0	0	0	0	0	0	0	0	0	0	0	0	0	0	0	0	0	0	0	0	0	0	0	0	0	0	0	0	0	0
	dThymidin	9.3	8.9	9.7	243.098	pos.	20252	0	76496	146013	120412	60714	20167	61110	126552	11500	6047	113898	70477	213487	182267	162896	187879	253380	122347	222689	209455	26407	342930	142723	138537	224659	157238	254775	554737	279512
	dThymidine	12.25	11.5	13	241.083	neg.	0	0	22092963	26671460	27345079	31071928	28852964	30268078	33938035	33290764	28592746	28699288	28384742	35719557	37070852	38518539	44274080	42663023	44484317	52973190	48093855	30242875	36014720	35862831	24630222	62038332	61334785	60751398	90148333	68464242
	dTMP	13	12.6	13.4	323.064	pos.	0	0	65655	65557	47804	30864	207278	33547	54050	35435	6114	16068	28249	43808	20186	23921	32583	18737	29839	31328	1335680	41680	9635	49747	47879	83926	61826	35306	140559	36027
	dTMP	13	12.5	13.5	321.049	neg.	0	0	46798	108678	33561	12122	304063	38512	107383	128872	35833	60098	43953	124755	65726	96751	106345	76841	89373	102233	2055298	45602	51663	204672	57101	229030	187218	134425	543668	239647
	dTTP	17.45	15	19.9	482.997	pos.	0	0	0	0	0	4377	0	0	0	8339	0	0	0	0	0	0	0	0	0	0	0	0	0	0	5977	0	0	0	0	0
	dTTP	17.45	15	19.9	480.982	neg.	0	0	0	0	0	0	0	0	0	0	0	0	0	0	0	0	0	0	0	0	0	0	0	0	0	0	0	0	0	0
	dUDP	14	12	16	389.015	pos.	0	0	0	0	0	0	0	0	0	0	0	0	0	0	0	0	0	0	0	0	0	0	0	0	0	0	0	0	0	0
	dUDP	9.35	9	9.7	387	neg.	0	0	80526	127805	136265	216214	73812	249656	336952	207535	89802	182434	152164	106642	275574	0	294692	148849	25510	98708	0	71809	173578	0	44762	160320	78175	320597	0	123702
	dUMP	8.6	8	9.2	309.048	pos.	0	0	17577	155876	3580686	1425439	2145722	439380	476510	710250	296634	52967	122993	122448	264860	81269	98920	77550	63854	35605	48935	49472	73448	14565	72374	48642	66697	63370	55180	237099
	dUMP	9.4	8.9	9.9	307.034	neg.	0	0	1477255	2127465	1359507	1345420	1209069	1860830	1449706	910104	1159818	684039	995897	984582	908440	1012105	629899	563617	159847	390842	533697	801527	961915	1031556	525161	1909605	920562	1888919	1898120	1705369
	dUridin	13.25	12.5	14	229.082	pos.	24406	0	0	0	0	0	0	25769	6627	29960	38918	0	16581	52402	0	36496	0	6253	12483	7633	35975	7831	0	25084	0	132863	73800	176271	111416	224673
	dUridine	12	11	13	227.067	neg.	0	0	13054959	13571200	13353619	15460739	13883633	13921945	16714254	15826522	13404422	14344650	13955125	16603451	17371472	18861727	21948816	20596705	21230552	24438788	22979582	14352269	17986533	16631222	12279734	28600425	29002808	28809260	39976624	29708336
	dUTP	17.45	15	19.9	468.981	pos.	0	0	0	0	0	0	0	0	0	0	0	0	0	0	5772	0	0	0	0	0	0	0	0	0	0	0	0	0	0	0
	dUTP	17.45	15	19.9	466.966	neg.	0	0	0	0	0	0	0	0	0	0	0	0	0	0	0	0	0	0	0	0	0	0	0	0	0	0	0	0	0	0
	Epinephrine	9.5	8.5	10.5	184.097	pos.	394380	405354	3137549	3269227	2995364	4045585	4128036	4348558	5500245	4499795	5081363	6708142	5022131	7460453	6403615	6297021	6216265	6306098	6413345	7247502	8209970	10169339	8832670	9440563	10921275	10045498	9106609	11843150	18753949	8677794
	Epinephrine	2.4	2.1	2.7	182.082	neg.	5779	0	32302	47020	95840	67082	82416	167941	151751	42369	46208	0	32163	60653	15026	24164	62937	48446	111050	130622	168247	44673	160317	108533	70136	120558	137695	148699	94416	179525
	Erythrose-4-phosphate	13.05	12.6	13.5	201.016	pos.	0	0	1972397	3727160	4299679	6785829	3056317	5049829	9488707	4170042	1738975	3220380	1917620	5054311	11872759	9245291	6821794	8308604	4861522	9823430	6226286	2659321	2173351	1989103	1133852	4465909	3513595	5842370	8571253	7309907
	Erythrose-4-phosphate	13.1	12.7	13.5	199.001	neg.	0	0	715709	1616956	2007471	3252163	1499854	2926500	5423699	2388439	985382	1926776	1228209	2865040	7536700	6179255	4729246	5766755	3665806	7296552	4784706	2041080	1666103	1513325	900813	3382774	2684456	4357265	6988768	5255044
	FAD	12.3	11.9	12.7	786.164	pos.	0	0	14475747	18917331	18873411	22847171	21571995	19789181	25436824	27048248	19365619	23097170	22708203	26210020	27406395	29925821	26092448	24891920	25505464	28627237	26709562	26357605	19125504	29724904	26666674	34504557	37813119	35993512	50701740	34187027
	FAD	12.25	12	12.5	784.15	neg.	0	0	2464422	2941666	3776903	4147186	3571968	4191292	5061731	6116994	4246085	4916652	5165563	5992901	6588032	8110150	7183241	5857365	7724273	8093170	7905513	8191247	4559311	9624439	8172179	11824307	10848357	13228353	21946195	11059891
	FADH2	12.5	10	15	788.18	pos.	0	0	0	0	0	0	0	0	0	0	0	0	0	0	0	0	0	0	0	0	0	0	0	0	0	0	0	0	0	0
	FADH2	8.35	8	8.7	786.166	neg.	0	0	0	0	0	0	0	17217	0	0	0	0	0	0	0	0	0	0	0	0	0	0	0	0	0	0	0	0	0	0
	FMN	12.8	12.3	13.3	457.112	pos.	0	0	1186164	2503085	1939400	2238166	3060513	2342793	2830963	3426171	2229956	3409372	3802749	3402500	2950574	2976630	3474779	2677202	3205626	3221474	3593034	3720918	3224101	4320618	4264109	6298861	6600817	5192676	8123841	4699146
	FMN	12.75	12.2	13.3	455.097	neg.	0	0	448453	995181	757622	949057	1109555	1043275	1226456	1456151	994776	1355790	1769712	1551969	1273397	1190643	1638879	997336	1372879	1383025	1730985	1737469	1536594	2024796	2194856	3144135	3538220	2743743	4436533	2139959
	FMNH2	12.5	11	14	459.128	pos.	0	0	0	0	0	0	0	0	0	0	0	0	0	0	0	0	0	0	0	0	0	0	0	0	0	0	0	0	0	0
	FMNH2	8.55	8.2	8.9	457.113	neg.	0	0	0	0	0	0	0	0	0	0	0	0	0	0	0	0	0	0	0	0	0	0	0	0	0	0	0	0	0	0
	Fructose-1,6-bisphosphate	18.95	18	19.9	341.003	pos.	0	0	0	10200	15165	19688	10539	30891	23554	5595	0	0	14912	7401	42700	22649	4374	15089	3530	9533	17012	0	16168	1286	5356	8202	32889	4188	5779	4261
	Fructose-1,6-bisphosphate	17.95	16	19.9	338.989	neg.	7833	0	42751	46681	11499	71821	85272	55354	75764	150536	27215	82754	48268	55192	346939	146737	135240	152896	75265	208945	125459	98374	114133	87216	71410	117698	68893	213692	196424	185179
	Fumarate	11.7	11.2	12.2	117.018	pos.	0	0	14973	20842	5340	21760	21004	25393	0	21577	17634	6831	22859	0	14613	31327	13673	25032	27515	13786	0	46419	0	17069	40754	15855	36818	15489	25185	0
	Fumarate	13.3	13	13.6	115.004	neg.	488619	221605	35643914	58023919	47358302	63409561	80557376	60291995	72931535	68308835	66366494	97497525	115264794	133133538	89812796	98215052	116970729	117763919	134050503	109693133	168762292	131307286	188594205	192930544	199699354	271583101	271692874	226563436	356267475	191384486
	GABA	15	14.5	15.5	104.071	pos.	5143690	3962265	306500928	344243363	292132471	326504273	392835164	360465666	390065362	395994858	448583543	429645578	406776075	490583152	397879677	377372944	441052523	415133333	494743860	416684406	492924799	574114123	457190935	400706095	516968257	832581935	748268177	675699287	779552309	802450899
	GDP	13.85	13.5	14.2	444.032	pos.	0	0	91684	86345	172736	206261	44387	121309	159770	159436	26857	136221	78128	222467	163234	261464	136656	271057	171060	280268	232028	251791	38058	326345	68711	132152	115491	184763	47539	256957
	GDP	17.45	15	19.9	442.017	neg.	0	0	0	9203	0	30795	10344	22448	43636	11548	0	10310	785	36555	50693	25422	64339	31765	0	6669	36053	83698	28327	94133	18683	84701	126233	11399	76574	41047
	Geranylgeranyl-PP	6	5.7	6.3	449.186	neg.	0	0	0	0	0	0	0	5918	0	0	0	0	0	0	0	0	0	0	0	0	0	0	0	0	0	0	0	0	0	0
	Gluconate	12.95	12.4	13.5	197.066	pos.	306913	304971	0	34325	0	0	18393	23952	4668	0	10114	0	8889	6228	0	6162	0	0	10333	0	0	0	0	0	6174	0	0	0	0	17108
	Gluconate	13.25	12.5	14	195.051	neg.	129025	9655	188052000	464922476	344387861	446678893	406180335	458308301	505416181	379074518	280398475	381482911	428298263	602921254	461108328	498503236	593369703	509334196	592525373	541120954	580061685	652900261	762342407	1035158914	784942548	1150791969	1241968345	1260128630	2084889138	1081415070
	Glucosamine	13	12.6	13.4	180.087	pos.	155906	46807	80678497	96924327	95363351	102294557	104275688	97107902	117420217	110436482	94967445	96181932	90808296	110290135	129863443	123592408	131757257	113746341	113393766	151050137	131914847	62168416	72948027	69467030	45940237	131579152	126895220	147452546	220219980	156948033
	Glucosamine	13	12.6	13.4	178.072	neg.	0	0	1085971	1346586	1183160	1224555	1190992	1235002	1525687	1503878	1147254	1395661	1078850	1366125	1844026	1633077	2059720	1708188	1649098	2223001	2070412	798153	966542	846651	573241	2101484	2089071	2419484	3358171	2340102
	Glucosamine-phosphate	13.95	13.3	14.6	260.053	pos.	0	0	5521861	7473808	7171495	7476783	5374918	7207339	8081627	5512150	4259500	4912547	4930580	7555146	8191205	9355819	8950574	8775502	7547353	9698410	8725388	8060311	7176456	8803183	5438048	10674600	7733441	9644961	15351961	10216157
	Glucosamine-phosphate	13.9	13.3	14.5	258.038	neg.	0	0	2512386	3669151	3439075	3525112	3240964	3672830	3681590	3318103	2922629	3032113	2905820	3850288	3473646	3628565	5970107	5606355	5340542	5266564	5474521	4779355	4829287	5202115	3556761	9761757	6555899	6574777	11568756	9581072
	Glutamate	13.6	13.2	14	148.06	pos.	12744110	11359671	1473021979	2135418224	1720636389	1820478368	2483006957	1841700125	2393292017	2755323863	2577256522	2545929546	2168622138	2432882141	2095238435	2056901283	2882944919	2259798817	2826312907	2389261300	2930507117	3061036278	2496550921	2686646191	2836869902	3885937047	3242240246	3296445990	4400450174	3150195005
	Glutamate	13.8	13.3	14.3	146.046	neg.	2398007	1547936	739751100	1054997017	890524988	931140567	1206206528	836849466	1216702463	1330237441	1372895490	1367537784	1236371922	1289744906	1198441082	1105945617	1844350180	1516929880	1959290306	1559572674	1876996863	2198109998	1765694814	1926674580	2077764088	3094249214	2649399700	2803574374	3465269729	2648560264
	Glutamine	14.1	13.5	14.7	147.076	pos.	8227926	5545873	1599049350	1072802618	1460705582	1372542490	901449892	1466513086	911812335	615907879	635715040	1014073583	940058199	1128709633	1087721551	927079072	950864814	1074931702	763766423	1112519712	1011910438	1444718697	1181467069	2417069931	1662676632	1169674011	580334643	1098640327	1466772914	1902619255
	Glutamine	14.1	13.7	14.5	145.062	neg.	67092	0	225305392	158677856	246341263	202664977	104278554	231384554	123906025	65953089	59285954	171555159	154727894	206152794	176521693	138082203	187784223	201197458	132215204	223085533	219849937	325005161	282420807	745733736	417634841	215161878	91686150	200702895	355761892	433176984
	Glycerate	12	10	14	105.019	neg.	61939064	44410777	46460944	46465781	49053483	51867350	50066452	52303249	52676012	54329991	54261659	54102805	53663694	58505186	54270955	54988578	65112844	68522413	68282147	68295668	65870030	68573960	75778050	77566774	80089917	87095164	89175298	87270722	90250154	87870899
	Glycerol-3-phosphate	14	13.4	14.6	173.021	pos.	0	0	10173837	33386067	12855011	10609250	24068117	15144833	25682322	41674334	11587342	34661160	30095211	16462215	17883247	14694531	22988073	12117322	14116158	13814058	14955923	23669605	21427244	23107127	13921031	41335305	84446018	46348767	56146128	24487317
	Glycerol-3-phosphate	13.95	13.4	14.5	171.006	neg.	0	18353	35293208	104181227	41170879	34622506	73353472	50366202	84043456	124530131	39997803	110662686	90508550	48616279	59051860	47878630	94939825	49450159	59991647	57387659	59450716	87155216	87401107	83279448	49068711	203416362	409903625	246155867	285497832	134937127
	Glycine	14.25	13.8	14.7	76.0393	pos.	5523654	4873350	110386019	151891855	127673301	156044898	159635219	139082350	171747506	184639938	149630554	170839562	160082419	197249996	183447991	202895254	215775210	186912785	214872257	201738481	222173602	248476152	213847054	274146573	298074106	333027734	274669888	329732973	505964577	286775893
	Glycine	14.2	13.8	14.6	74.0247	neg.	208085	223662	45885495	66650119	56376240	68995986	72357537	59969953	76191265	80527664	66785957	84391061	73607436	95564425	96094516	104992959	131576392	108490604	144453502	132059158	144287343	171626711	139584580	200489788	205102162	247339023	187941766	236183872	381618776	213011611
	GMP	14.1	13.6	14.6	364.065	pos.	151319	77773	16130315	11206029	15316762	33416643	8845648	14905533	29766797	13729933	7908052	8407671	9005467	14466118	31284998	38048361	21118076	25592653	16563715	34692729	21438016	18393733	7640140	11207065	9464198	14677395	13565069	19979793	27239548	22622598
	GMP	14	13.5	14.5	362.051	neg.	0	0	6286947	4774513	6739181	13313942	3752806	6275385	12461603	5047607	3197543	3652004	3962159	6545107	15932419	18163295	11423148	12534591	8870961	18438312	10913315	10039685	3843287	6041956	5055349	10818203	8854199	13908099	19208042	16593166
	GSH	13.5	13	14	308.091	pos.	2040581	4433142	1199528360	1964087154	1676307312	1508820315	1627007666	1688665549	1817985073	1887353865	1034323800	1620716852	1507557177	2105843055	1966581084	2126585109	1927392145	1777429576	1854791218	2026928839	2072209392	886636483	1724375895	1455886977	858361212	2334498223	2634117299	2396638805	3571818904	2667319116
	GSH	13.45	13	13.9	306.077	neg.	393616	334536	308446639	574741075	511505367	439622776	473464123	513277940	601781827	610910182	300882707	541396628	504963944	798017122	726233115	831875689	845065271	809410062	887448695	967938730	1022768377	375880875	865788232	744233461	395536839	1407623529	1597342828	1487535472	2438427951	1807018491
	GSSG	14.5	14	15	613.159	pos.	0	0	159341484	161365761	196161431	203076148	195351652	140085737	153310587	140355878	113075489	200934845	219341612	240075908	203487078	212259759	211322472	212430597	256378209	206875797	282422181	297623884	228229278	287130390	347785852	311766755	270169530	284199195	372155258	297764852
	GSSG	14.6	14.1	15.1	611.145	neg.	0	0	44344942	51782531	62211692	67458149	61741105	44630378	52434947	47024850	36161309	72757597	72871304	88092736	75984447	79950709	89530223	90505298	118620912	96117104	133037620	118902307	99740716	116161783	142045161	204327202	169034746	181546769	250976413	181566211
	GTP	17.45	15	19.9	523.998	pos.	0	0	0	0	0	0	0	0	0	3730	0	4166	0	0	0	0	0	0	0	0	0	0	0	0	0	0	0	0	0	0
	GTP	17.45	15	19.9	521.983	neg.	0	0	0	0	0	0	0	0	0	0	0	0	0	0	0	0	0	0	0	0	0	0	0	0	0	0	0	0	0	0
	Guanin	10	9.5	10.5	152.057	pos.	2197480	1477820	63135748	65294333	34364607	39763184	31046656	23536811	28006737	27491606	22646570	27330811	24909835	22041721	22565596	22816237	21969381	19046944	19953625	21224974	20230864	16175558	12919482	17213250	16190379	19024194	25624103	20262189	26056282	24173095
	Guanin	10.25	9.5	11	150.042	neg.	16966	6056	4954566	4642984	2815720	2976075	2249579	1737804	1999172	2004209	1663581	2127931	1911297	1560534	1726380	1705593	1564477	1470240	1489712	1589595	1520484	1264587	1065904	1259989	1297486	1670909	2363428	1934365	2311933	2151570
	Guanosin	11	10.7	11.3	284.099	pos.	51420	14646	58798621	62925295	69960687	69349285	58973033	60849729	83082288	70968205	53321895	70956329	57634993	66823238	84468940	78713981	76337429	70930788	60261378	80339402	80733173	46684169	32817794	39546788	45258068	62568231	86853008	83972640	111408719	83266627
	Guanosin	11	10.5	11.5	282.084	neg.	0	0	13933997	14744782	15797593	16283992	12704108	13523592	19200251	15870617	11670485	16129395	14247241	15890400	19465305	17180806	18054941	14290464	15580378	18978554	19595790	11146567	9926075	11256622	11972355	18876702	25677357	24281917	30833455	24979907
	Harnsaeure	8.5	8	9	169.036	pos.	4565711	1046407	70469	656259	12404500	8656308	10899014	3295509	3026777	3905223	2932217	422567	863470	833271	1690635	761398	775573	505978	508372	533745	509836	626060	774170	317826	728358	506728	555768	533655	266822	1303434
	Harnsaeure	12.05	11.7	12.4	167.021	neg.	0	2323	27407855	31017185	23242044	19156284	18548133	17092198	22130063	18349207	17327333	19664270	20558907	18818620	20980286	23848388	26399930	20661109	32066384	17826224	26914639	31984958	33790299	33026823	34691999	37483837	37824379	50238983	55473036	31138973
	Hexosephosphate	14.05	13.5	14.6	261.037	pos.	2316	2572	18435758	32518287	22219267	27438238	23137165	21390858	31193653	23977766	12667409	22208093	16470487	21555930	32322552	40152067	27183093	33169481	22540268	41330260	34669160	11976747	24382203	13802475	11456342	34983963	39750973	39070926	42817321	34592979
	Hexosephosphate	14.1	13.5	14.7	259.022	neg.	0	0	105233104	168941193	128196597	161413349	117636518	123911143	189443404	126250031	70369799	120575755	79777279	123967792	207745850	240163096	194406163	206219737	161677381	296360067	236362794	80854389	146653864	86878960	65713129	275907532	282802686	295829623	381295410	303605947
	Histamine	16.85	16	17.7	112.087	pos.	675211	1285447	2463994	2826935	2493770	2935976	3028423	2596808	2771613	2804999	2640061	3315698	2854175	3356165	2850439	2383811	2072129	2235111	2390439	2113113	2496735	2367161	2353123	2611889	2464990	4308054	4618150	4438309	3912888	4186251
	Histidine	17.35	15.9	18.8	156.077	pos.	24264533	9013296	3745254115	4602523523	4289523069	4986389344	4802678635	4167084335	4693679385	4720609761	4573531420	5461566953	4806007808	5703044235	4879059214	4679227137	4534461449	4848724381	5283180889	4814058436	5512900209	5442395254	5108775856	5861315243	5626866091	9528108825	8980317806	8894996044	8762985183	8286143946
	Histidine	17.9	15.9	19.9	154.062	neg.	233553	89373	144656135	235090867	204810760	255814254	264052664	241944190	272214661	302717024	255322217	365190540	311496725	404639875	345038612	265023157	360594074	400607441	466482504	408678645	495008841	489804715	505578905	601225163	515112673	962155392	848485054	872493983	1072431016	783870612
	Homocysteine	12.5	12	13	136.043	pos.	0	0	3114656	4125497	3844636	3458998	3724900	3375174	4030916	4196580	3671556	5141656	3662661	5392671	4353452	3975806	5012828	4154158	4386741	4342843	5155026	5712670	5493120	5578867	6279931	8013865	5663689	6725753	10934500	6735084
	Homocysteine	12.7	12.1	13.3	134.028	neg.	0	0	110031	223694	77637	144406	357216	180390	87084	199518	224808	354360	101992	441320	164575	299820	92104	122500	132017	17496	171361	378104	579471	376602	591042	332267	846180	285485	1030767	199063
	Homoserine	13.9	13.3	14.5	120.066	pos.	4570552	3977110	301722786	351567414	351148252	423467913	423622473	408672942	467192642	472754901	440011409	406522324	385353335	615192011	485684471	537005053	532575661	563038778	664764330	578899678	642635417	755168546	579451886	884528057	584609918	905497195	763155682	874871276	1343001639	873973962
	Homoserine	13.9	13.3	14.5	118.051	neg.	47817	17706	82957372	101035104	101628440	117014698	107353805	111473413	135389014	126007269	116369180	131707624	123744758	195024338	149322963	162975404	222822902	227027371	284997736	227804814	263302509	352080566	268486307	417681330	285913270	421355520	350416012	416675342	647095991	416627938
	Hydroxybutyrate	6.75	5	8.5	103.04	neg.	4481982	3480226	1169201112	1367447955	1401489844	1276848503	1248485539	1677509225	1373052839	2805092645	1792497253	1206699460	1576706010	1738543109	1736006978	2081479748	1889253185	1684053545	2450957496	1588624060	1972490814	5003698788	2741998913	4522260395	3771736273	3259221931	2683073410	2700988310	4328669507	2917641129
	Hydroxyphenylpyruvate	11.7	11.4	12	181.05	pos.	0	0	0	0	0	0	0	8323	0	0	0	0	0	0	0	0	0	0	0	0	0	0	0	0	0	0	0	0	0	0
	Hydroxyphenylpyruvate	8	7.5	8.5	179.035	neg.	619672	273168	3016891	6687589	2163093	2183626	4854496	3054676	3517616	5496650	2852624	4178697	5247969	4426975	3852533	3256656	2761814	3369862	2137763	4589999	3782575	1750992	5433030	3288304	3061696	7304488	17291086	5600960	7884082	7378591
	Hydroxyproline	13.45	13.2	13.7	132.066	pos.	245502	302411	9817222	12590697	8841182	8304717	8023664	7533413	8644108	6713982	4759287	12153246	17082213	22979006	11419878	13457480	15545546	10628665	10577898	9823577	14382996	21899984	45834411	37152459	27957115	23907213	26809212	24672896	43330714	21945031
	Hydroxyproline	9.9	9.3	10.5	130.051	neg.	407251	448518	39323821	44026404	39612949	48070556	46187733	45516483	51671570	50806838	48384648	50819392	52607150	70126474	58107465	63433795	61397778	64098291	72200293	67721893	71686021	89705502	69652032	105617055	76419676	110844312	92035770	110485391	186944089	101963707
	Hypoxanthin	7.75	6.5	9	137.046	pos.	1102591	1132614	17351993514	24799927777	20084767300	22198632532	25171203474	22677021988	25131538863	28858315004	25040676254	30629439927	30685101727	32740264767	29974878777	28610565243	29675683162	28051412600	32347007360	30901021099	38036065380	37509601136	39186946533	47593054307	42749791921	43423410620	48618029169	41855084084	55124407174	39515637567
	Hypoxanthin	7.5	6.5	8.5	135.031	neg.	3523078	1222916	4762347622	6700547337	5598776348	5913869493	6702537741	5862714648	6493910838	7084353868	6551607672	7532201144	7422119996	7751695977	6970192679	6528830284	6351742338	6042827585	6701415994	6800261025	8184754636	7347522270	8276398149	9269895638	8361582562	11550687202	13130780701	11825877894	13843351910	11527024308
	IMP	13.95	13.4	14.5	349.054	pos.	3901	65	6936384	4198615	7346915	13660482	2204935	5739630	9182986	3757352	2519014	2204840	1650549	5700304	22985602	23202117	9639523	11500981	5603468	15110846	5325006	6950922	1328146	1144678	948436	4594791	2158690	5866116	8666976	6603886
	IMP	14	13.5	14.5	347.04	neg.	0	0	3282961	2001590	3624208	6352915	850924	2887603	4578549	1664936	1088172	1111256	577514	2872239	12071831	11830308	6015478	6941846	3661736	9144684	3084501	4274645	714554	602349	591191	3464923	1343772	4717103	6697790	4978593
	Indole	12.05	11.8	12.3	118.065	pos.	10429155	15539179	18802919	19097858	20750030	21034464	19451316	19813358	20732949	19179002	17440228	15592151	16453348	18543726	20168304	19717524	15800779	18280245	17792190	17744737	14275713	14289474	12205766	16330658	11279778	17745118	19117185	21994340	26868472	22820475
	Indole	11	10.5	11.5	116.051	neg.	0	0	862430	942106	933632	942497	984558	1027657	910600	1267994	1048422	1110414	1110290	1463627	1343684	1405663	1317012	1350458	1579582	1214181	1454349	1766397	1413558	2741923	1639987	2403521	2069834	2576458	4343060	2656557
	Indoxyl	2.45	2.2	2.7	134.06	pos.	28233	15657	546249	176331	279655	393498	705646	479075	304974	147775	37552	743042	120779	494155	1127376	692387	166035	440020	1009764	755007	685617	58232	1087674	169516	193416	85986	395470	280321	943129	480382
	Indoxyl	14.4	14	14.8	132.045	neg.	0	0	440916	591806	931332	710917	494239	720150	973972	575141	626395	589541	532303	1342040	1363081	1385896	1407048	1224853	1404412	1033497	1034828	2007544	1263765	3257874	1096278	1410920	1249258	1709093	3967930	1559571
	Indoxyl Acetate	2.05	1.8	2.3	176.071	pos.	22291	8791	318821	817432	270177	286775	642902	923462	1317187	738871	246338	390248	78358	958283	522023	729259	445869	940498	901751	890272	1386201	541855	1183972	660714	578995	1083229	520844	816389	1575400	1128046
	Indoxyl Acetate	12	10.5	13.5	174.056	neg.	56933	42224	491388	906796	288111	1538445	202356	411805	589719	225715	451977	495045	553312	698353	368071	233857	51134	184282	397243	415630	235590	303007	1420028	1626361	572412	685583	1170141	1121298	1100181	800755
	Indoxyl Sulfate	2.35	2.1	2.6	212.002	neg.	69728	155118	28225442	14331289	14299415	18405364	26836003	21503980	20299853	7049697	4412579	26580783	11839559	23659244	43825529	30417361	14362430	17641899	44093193	31517179	26345271	8522220	34444344	8853453	8183704	13751488	13481409	15476768	46651629	21120561
	Inosin	9.9	9.3	10.5	269.088	pos.	0	4325	1469097577	1702303035	1626985005	1788530936	1614576323	1763600832	2060821269	2172101000	1499423822	1840886849	1436529265	1871621389	2078996581	2199476166	2058867157	2029977187	1894017617	2255993971	2042480158	1592563807	1164575654	1704323568	1091962311	2326721363	2301442030	2219951062	3087790917	2209523227
	Inosin	9.8	9.3	10.3	267.073	neg.	0	0	887265791	985689223	949702325	1023386295	873314305	954598386	1168628849	1227380842	814860839	996202616	753929807	1020512744	1148579324	1173227255	1171969860	1051058461	996058509	1249739584	1117693385	862506867	525906850	845846142	514040602	1529500932	1460377652	1463488534	2143017189	1406739763
	Isopentenyl-pyrophosphate	13.15	12.9	13.4	247.013	pos.	0	0	0	0	39753	0	0	6840	0	0	0	0	34098	0	0	0	0	0	0	0	0	0	0	0	48208	0	0	14116	0	17351
	Isopentenyl-pyrophosphate	2.15	1.9	2.4	244.999	neg.	0	0	11427	46680	35653	24130	83108	17981	17144	15074	34752	0	0	80763	24005	0	47218	18014	30999	24133	13753	19408	16174	88767	0	0	0	40180	0	100818
	Kynurenic Acid	2.45	2.2	2.7	190.05	pos.	289393	333495	1548019	3723534	836388	631634	1792724	1275715	2012968	757064	1311759	3135420	3306571	2372290	1860914	1187993	1884709	742218	1068167	1043148	2180461	813788	5156513	1473115	3158742	2662459	6088609	2916327	3857230	2081139
	Kynurenic Acid	5.4	3.8	7	188.035	neg.	12504	6225	2896895	5880844	2141002	938753	5056839	1829258	2938902	642223	1480278	5243308	7461709	4185354	3259174	1443466	2620248	1468158	1321083	1110123	4189890	1069782	9226050	2590735	8661276	8749926	19962890	8635770	11282361	5354934
	Kynurenine	10.85	10.2	11.5	209.092	pos.	46653	5559	72329359	107284841	56994393	79239253	105911182	106799509	109126065	43365341	56360938	100098094	128664723	122198047	71052349	80794391	69768401	73262882	80276492	58664749	90113970	116245850	161930411	101065611	114292899	151333273	196642804	100911568	200445240	94565027
	Kynurenine	10.8	10.3	11.3	207.078	neg.	0	0	5984660	8991492	4561799	6531008	8471562	9228128	9796178	3789137	4621862	9007672	11194117	10903114	6381778	6554570	5805291	6261617	6849354	5106647	8600482	11002697	16182705	9938040	11839847	16633273	22161052	10950354	21786456	10515852
	Lactate	10.25	9	11.5	89.0244	neg.	63612369	91270233	8696000678	9398196703	10404963871	12007879445	9514011932	12688907593	13168552593	8858744861	8881934434	8916576979	9723278766	13271021807	13637338896	14145966092	14631744287	16210060209	14198414138	17729323567	15187852501	15727239285	14761213020	17575965459	12378503647	21322997467	15946881080	19699303919	33269324554	17375768058
	Lamivudin	3.8	2.5	5.3	230.059	pos.	1169295	2558332	6882256855	7945101014	7506864918	7963283637	8233126500	8282245630	8238268465	8449939679	8448419530	8783030957	8807998765	9229096349	9412250343	9326044900	9180393060	8888589175	9427284904	9341613734	10275427884	10279475751	10556295496	10099421730	10083353801	10583446986	10935084818	10924386909	1838497469	13389417868
	Lamivudin	3.65	2.3	5	228.045	neg.	0	0	144018237	196757331	204981570	219855880	232685552	234478860	230963385	242514176	246960861	252801234	253071620	262451086	279645034	278779308	255866021	248807680	260130122	265204944	313590640	285328540	322925713	304152250	293231756	386035128	402642364	422344781	30578786	616789340
	L-DOPA	9	8.3	9.7	198.076	pos.	10993	19784	109681	138170	27393	109618	139384	167223	185997	99244	127521	261392	90432	338753	300233	355652	219577	602068	500025	518897	569597	568422	675078	535335	784525	668923	721082	634272	671152	897809
	L-DOPA	12.35	12	12.7	196.062	neg.	0	4612	1696518	2276967	1223746	1207486	1447454	1297085	1558967	919818	392053	2790077	2546206	2193095	2272138	1738991	2511597	1968606	1850590	1240159	2247921	1223263	5843098	2248466	2146763	3661520	3350100	3475491	4810584	4744248
	Lysine	12.5	10	15	147.113	pos.	17530573	9308643	2616889	33137581	33729494	33846612	37412779	35830715	36304602	36752963	43237692	35485094	38074834	37990539	41775723	41073075	41298147	41239561	41410793	44813538	44105780	43017498	48779350	43353062	49213148	56127087	59243692	62443450	55555440	76548871
	Malate	11.7	11.2	12.2	135.029	pos.	0	0	11900174	15961874	13497207	14359690	14590757	13554417	15303438	15849930	14458742	14925701	16699712	19867861	15413851	18697081	15430467	16846341	18604035	16663896	19094821	19236084	16725611	21282120	16117134	25135617	25551372	22982560	32896019	25115932
	Malate	16.45	13	19.9	133.014	neg.	34946483	33212082	489273470	2342918715	1999859114	2414249038	3147391329	2397905623	2777207092	2419985687	2379065440	3749401213	4464265566	4907550255	3344665544	2870999753	5064891083	4779363828	4992732954	4444872258	6304242431	5927096171	6864614625	7291604042	6517880541	14291897117	12482564936	11658731233	15464436420	11975535379
	Malonate	4	3	5	103.004	neg.	1638571	1394792	10452515	11309862	8056903	8842181	11801962	10837059	9364857	7121441	6163572	9006289	9615696	10536422	10663376	10166162	8994695	10382439	10421263	10713865	11986607	11201541	13829475	11781687	10374253	16891202	18153779	15979858	19005566	17207049
	Melatonin	5.5	4.5	6.5	233.128	pos.	0	2880	38438	3183	62916	39870	0	7952	2294	0	0	0	8270	0	0	0	0	3490	35369	3434	27341	34362	0	199248	207303	22321	3655	30096	14750	34488
	Methionine	11.85	11.2	12.5	150.058	pos.	320037	353436	1677477356	2143657159	1842456921	1993519610	2002740441	1852295421	2148223999	2205059305	1985241224	2088122910	2278311350	2724566913	2164172479	2488561742	2252788001	2398924379	2597714966	2328803994	2628544221	2690801730	2424379177	3057796409	2360676719	3503753064	3493778385	3185066734	4475690953	3484479644
	Methionine	11.7	11.2	12.2	148.044	neg.	0	0	171774958	227005607	204761765	226989542	224022460	214206145	233193051	258056559	235578829	240223451	262410457	359984329	238096779	282350268	275652399	296927451	365017890	276839771	337072174	498692330	376346446	576738957	425715078	534620401	510257026	463796282	751658153	504804168
	Mevalonate	14.1	13.6	14.6	149.081	pos.	40105	236462	9572252	6221069	9030143	7885793	5071783	8968395	4950364	3529484	3594870	5760127	5533071	6342976	6148339	5211601	5506121	6298198	4252095	6580808	5749274	8230649	6463737	14342735	9665002	6843745	3054003	6052247	8353083	10855664
	Mevalonate	9.5	9	10	147.066	neg.	57955	179464	2678106	1606169	1396298	1284306	1301524	1194886	1037159	511950	959461	1934215	2976147	2233528	1824214	1000082	2123651	1526816	2493122	1676232	3119940	2427941	2614027	2873193	4147472	3172498	2988562	3861343	4761756	5744750
	Mevalonate-5-phosphate	14.5	14	15	227.033	neg.	0	0	28353	25501	32743	0	15023	12723	11466	23903	31934	11421	0	0	36047	39137	44641	32007	26825	46659	0	108375	57857	122330	51575	0	116020	171796	0	0
	myo-Inositol	12.1	11.9	12.3	181.071	pos.	90864	68531	1806	0	22749	8231	0	55623	56764	22	64058	60529	20785	5634	0	4766	0	0	35813	36841	7410	35606	38084	67865	28141	60553	153	10404	87844	844
	myo-Inositol	12.25	11.5	13	179.056	neg.	84648	77365	4041863311	4771087970	4788832814	5316746989	5019895516	5257736212	6009612971	5590913159	4856204947	4917881603	4878034316	6128185137	6377458440	6589675321	7322200996	6937845649	7441881970	8573463159	8061568360	5134732641	5772893186	5898299915	4070287811	10163437747	10324222727	10498404025	15075835381	11194324015
	N-Acetylneuraminic acid	12.9	12.4	13.4	310.113	pos.	3159	0	6601448	10471765	6948734	7356402	8901149	7546854	8542657	8899914	7831955	10232032	14481796	13151294	10300307	10968083	10650557	11227540	11648955	10156399	11403285	15129487	14251065	17389984	15535084	19040451	22694111	18751627	25078031	17979258
	N-Acetylneuraminic acid	11.9	11.5	12.3	308.099	neg.	0	0	108547347	139604161	88449363	90458081	120256222	93200408	99045948	104415164	86909371	128079753	156256881	117460516	117045211	106629021	117541690	105038083	122237618	129127411	136573276	87469020	112365053	95794172	89689570	234270961	301465459	222047928	294935544	189753013
	N-Acetylornithine	13	11	15	175.108	pos.	3714524	2390411	47955394	39676861	40931631	34423524	30366905	33088610	34409926	25260028	28054136	33181574	32392142	38386676	35732595	37136837	30029851	34337582	30688741	34467022	30228651	30901857	33250334	35381147	28137404	33639880	39389853	34580622	43679053	35086719
	N-Acetylornithine	12.75	12.3	13.2	173.093	neg.	7279	0	3164536	2196492	3923130	3834939	2311568	3476616	3454545	2430682	3680655	2492931	2620022	4383112	4007423	4757703	3389799	4252705	4023140	4427206	3226168	4594223	2669165	5867859	2075465	4138079	3761261	3818618	7106800	4414000
	NAD+	13.55	13	14.1	664.116	pos.	0	0	3262168	4433368	3637572	4399841	4632502	3663605	4575466	5425192	4398794	5470387	5050618	6076546	4125903	5486534	5656968	4329780	5754320	5349029	5770673	7872853	5133569	8470225	7714727	9169324	9167805	7780830	11801756	7130836
	NAD+	13.6	13.2	14	662.102	neg.	0	0	394135	595649	624031	694648	544992	491999	584070	869682	566374	591510	914182	855951	725078	876108	889338	736427	1118203	943275	887668	1743005	1159800	2056673	2013904	2158309	2130809	2486609	2835874	1568896
	NADH	12.9	12.3	13.5	666.132	pos.	0	0	285518	492892	1700447	1224006	406191	571980	976017	365266	114888	99054	254884	812065	714139	935983	668000	1221373	767826	1018393	1014109	770775	774599	3547257	1286813	1210673	823377	362801	1824557	1462518
	NADH	12.7	12.3	13.1	664.117	neg.	0	0	92080	173772	549606	390633	139020	166343	456364	121439	29311	34509	168495	496770	360265	495099	379963	549453	334386	542198	548547	452188	395268	1933455	795066	902310	488354	244251	1201379	1232987
	NADP+	14.5	13.9	15.1	744.083	pos.	0	0	23625	20017	138607	172614	147449	78355	283670	189598	165342	461417	555240	351480	104216	377312	394551	287549	384819	439178	280037	511236	289907	579544	585485	580522	677166	720306	1241161	391837
	NADP+	14.3	14	14.6	742.068	neg.	0	0	0	20349	26655	10970	28221	12024	21884	35684	0	47262	97160	0	57012	83429	62816	35053	122539	62809	27050	175924	69074	115602	195755	257631	423502	466590	402410	214879
	NADPH	14	12	16	746.098	pos.	0	0	0	0	0	0	9060	0	0	0	0	0	0	29257	0	0	0	0	0	0	0	0	0	0	0	0	0	0	0	0
	NADPH	13.4	13.1	13.7	745.092	neg.	0	0	0	0	0	0	0	0	0	0	0	0	0	0	0	0	0	0	0	0	0	0	0	0	0	0	0	0	0	0
	Neopterin	2.3	2.1	2.5	254.088	pos.	0	0	63779	209340	9353398	12088285	13201578	5134123	5441223	4827725	4612610	276552	1206770	889233	1861359	525431	694872	114932	94256	190587	298811	100406	156112	61149	441696	120255	93195	115742	12660	982515
	N-Formylkynurenine	11.35	10.5	12.2	237.087	pos.	4311	5094	4003443	8180264	4621862	4009661	6313650	5009460	7610102	3045935	4022149	7315970	8852263	8947927	6502509	6281022	6728857	5603279	6483596	4477597	8473836	13294604	11421372	22687465	16772232	12156780	16568581	12050433	18945876	9844871
	N-Formylkynurenine	11.1	10.5	11.7	235.072	neg.	0	0	535212	1013872	553497	385519	740481	704686	1098012	316011	381113	1030934	1159968	1305993	811046	764273	867329	617848	918504	332839	1143299	2383945	2262197	5195112	3208385	2155857	3117273	1870660	3967387	1428978
	Nicotinamide	2.4	2.1	2.5	123.055	pos.	2579420	2626668	3608068172	4246986862	3437990219	4026474067	3352196559	3557217920	4779174345	4163260690	3167048263	4182549581	3695084328	4616805261	3900175912	4003328499	4130820410	3556864781	4290626346	4203430062	4826070096	4953980105	4495596380	5163991917	4495596036	5280431095	5292109406	5175023542	7910606478	4550518405
	Nicotinamide	2.4	2.1	2.7	121.041	neg.	163638	84762	4246714	6472857	5648634	6005390	5803527	6209486	7597552	6878354	4678592	7424792	6064667	7721061	6073814	6793102	8534031	7040318	8656521	7709540	9653706	10426749	8284844	10858293	8573493	10928650	12675091	12411143	20821893	10805336
	Nicotinate	8.75	8	9.5	124.039	pos.	1045724	1296494	13837918	16994868	9802213	11914295	15702282	17978782	19399096	18299604	17145579	16166421	14172840	18772931	15510108	16450625	17953703	15404258	17188405	19195538	16699713	22150435	20080367	15278157	16729785	24273596	22817794	24157117	37998426	17318001
	Nicotinate	8.75	8	9.5	122.025	neg.	794665	1474043	8790262	10246065	7538944	8086317	10677236	10698935	11596001	12413905	10774380	12529026	11148499	12777919	12084103	10963326	14464419	13376121	15100783	15803467	15077197	19515808	17153107	17894393	17967637	23999217	23298397	23078969	35679328	19573610
	Norepinephrine	10.5	10	11	170.081	pos.	237694	109069	5551764	5034513	3071633	5536648	4342714	4466091	4906998	3238900	3078755	4922726	3671210	5278260	4232714	3713255	3185614	4013206	4304728	3435688	4431262	8818234	4544022	4203632	7920391	7115680	8217933	7234419	17867267	4971924
	Norepinephrine	10.4	10	10.8	168.067	neg.	42359	18048	336834	278972	135679	327615	285981	301796	263455	178697	185644	378686	221945	299342	188493	164384	191025	206772	341080	163538	315037	797892	370805	355341	697594	660490	808878	549966	2529554	397227
	Ornithine	11	10.5	11.5	133.097	pos.	2204302	995490	15607885	16409713	17698899	18430869	14572194	18931644	16164464	16477492	15450414	19033778	14090204	11700830	14984886	10665417	11420598	10724727	15338659	12180871	8788036	12569465	8401096	17385314	10127455	18361552	23279284	20973600	48940273	18959952
	Ornithine	11.15	10.5	11.8	131.083	neg.	251961	32373	5398135	6838987	6439142	7163371	7013585	6894721	7472086	8125537	7625394	7969524	8258507	11122040	8263694	9210548	8393697	9286052	10820581	9269758	10080044	13512366	10404199	16651361	11862063	16389382	15504750	16209721	24336148	15565341
	Orotate	9.25	8.5	10	155.01	neg.	0	0	11589261	17539319	10615739	14431698	15130597	7810080	15065093	3659911	813243	23864624	19683737	35745754	17313593	26553617	20194863	21338163	16363883	19720215	26058606	7477270	41109601	16875058	24887115	61702343	37029432	100515031	136441527	98252439
	Oxaloacetate	4	3	5	130.999	neg.	167275	111022	65470	171338	190605	242507	147713	179573	126161	132281	118961	140795	143277	265197	149240	218757	246222	172854	226841	198567	249291	197583	174185	355821	195963	305475	376245	330142	243167	418712
	Pantothenate	9.05	8.5	9.6	220.118	pos.	27536	41287	183547197	211255023	182631294	263009455	301018151	294692155	390302763	426112757	316000751	377076753	345177095	597731910	458167279	532778953	568878419	501075274	480042435	709550216	721933606	688520957	608831858	878712404	628522817	848117376	878231855	868554134	1541614585	758650313
	Pantothenate	9.1	8.7	9.5	218.103	neg.	0	0	89072665	96641345	80632392	105492664	131365435	115990194	132134967	173508288	133522003	146483244	137494004	170418359	140000547	141215237	162012110	149378934	152972605	168178759	184646895	206713043	167527526	243654878	199066113	276198393	313915871	285972070	453001854	255713708
	Pentose-5-phosphate	14	13.5	14.5	231.026	pos.	4314	0	1858277	2321360	2478857	2828505	1986324	2350782	3119494	3226228	1712838	2019982	1751323	2249945	3359888	3854046	2893655	2738802	2387302	3620859	2702149	1955626	952205	1270710	866871	3217842	2979030	2922080	3533952	3088087
	Pentose-5-phosphate	14.35	13.3	15.4	229.012	neg.	0	0	52608454	57529533	57984576	67134179	48340120	59189532	75327037	73155607	45268223	52234860	39145526	52210464	78975186	93833915	90237997	78460304	74590723	104948989	82746496	63478507	33558079	46026177	32630458	116746468	108539399	114854701	147713633	116443875
	Phenylalanine	10.75	10.2	11.3	166.086	pos.	8333803	6610708	2588767952	3251484553	2910450726	3334998583	3073026723	3093269981	3413242579	3413539913	3066012986	3220128567	3418820546	4705667744	3554119595	4144370020	3521830809	3963703378	4333848059	3963093061	4129111651	4958829098	3916763796	5892878134	3773775836	5349799729	5181605401	4988492154	7889254095	5242072656
	Phenylalanine	10.6	10.2	11	164.072	neg.	122901	214076	668643638	820991385	740342381	842256784	792667334	766760794	859409467	909913360	820876045	873098563	899859970	1205299581	902317380	1048785834	939442428	1027924194	1166353688	1026966682	1142184374	1346804508	1097526591	1489631711	1103573043	1717337947	1680041755	1579214342	2118361597	1724348166
	Phenylpyruvate	12.3	11.8	12.8	165.055	pos.	0	0	310562315	344742659	372498250	426090155	362678213	371853334	423892067	407586777	373661133	330889249	337115397	484467626	446680489	502753452	439774488	497994437	513718584	513567523	493131148	495100883	401382877	571739463	362753564	592725922	545043820	634942885	913208181	675552281
	Phenylpyruvate	12.15	11.8	12.5	163.04	neg.	163965	140947	2125907	2135126	2355307	2510992	2378826	2067403	2097258	2619896	2163110	2211174	2095844	3183213	2636951	3272200	2514239	3031857	3669510	3340184	3344220	3626326	3765196	4909246	3314585	5301478	5233435	5432268	7671263	5085876
	Phosphoenolpyruvate	14.1	13.6	14.6	166.975	neg.	0	0	7390980	10054782	9262271	8442772	8099058	7847552	11967967	9943672	8273823	11512407	11561115	9516121	14832939	14468934	15115185	11072933	13427080	15508350	14493052	14080064	14843082	11613467	10264299	26727137	32333561	33401083	33917957	24356875
	Phosphomevalonic acid	9.6	9.2	10	229.047	pos.	0	0	4344	9126	76216	18385	0	15101	0	0	4818	6428	0	0	0	0	3246	0	0	0	0	0	0	0	0	0	0	9406	6099	0
	Phosphoserine	14.25	14	14.5	184.002	neg.	0	0	0	0	0	0	0	20699	0	0	0	0	0	0	0	0	0	0	0	0	0	0	0	0	0	0	0	0	0	0
	Picolinic Acid	8.75	8	9.5	124.039	pos.	1045724	1296494	13837918	16994868	9802213	11914295	15702282	17978782	19399096	18299604	17145579	16166421	14172840	18772931	15510108	16450625	17953703	15404258	17188405	19195538	16699713	22150435	20080367	15278157	16729785	24273596	22817794	24157117	37998426	17318001
	Picolinic Acid	8.75	8	9.5	122.025	neg.	794665	1474043	8790262	10246065	7538944	8086317	10677236	10698935	11596001	12413905	10774380	12529026	11148499	12777919	12084103	10963326	14464419	13376121	15100783	15803467	15077197	19515808	17153107	17894393	17967637	23999217	23298397	23078969	35679328	19573610
	Proline	12.85	12.5	13.2	116.071	pos.	14643127	5195675	1430487810	1932077169	1478506346	1683440035	2041533414	1742886500	1996988371	2219167816	1987845985	2232804350	2341795603	2791510488	2227397735	2394969089	2380693441	2394387655	2459057189	2382714464	2618819806	3063934293	3226331768	3456349290	2815875005	4085331230	4024422153	3700434144	6155298188	3710295101
	Proline	12.9	12.5	13.3	114.056	neg.	525286	432455	289010915	412751969	298627669	354562430	414107497	358191039	422437098	476817043	392317285	481728473	496721517	620238219	465961207	497228761	521256798	530691054	586392786	527332911	618401353	771555936	830102907	825675605	703138054	1054814423	1084787066	970053767	1676153747	916646591
	Pyridoxine	10.5	10	11	170.081	pos.	237694	109069	5551764	5034513	3071633	5536648	4342714	4466091	4906998	3238900	3078755	4922726	3671210	5278260	4232714	3713255	3185614	4013206	4304728	3435688	4431262	8818234	4544022	4203632	7920391	7115680	8217933	7234419	17867267	4971924
	Pyridoxine	10.4	10	10.8	168.067	neg.	42359	18048	336834	278972	135679	327615	285981	301796	263455	178697	185644	378686	221945	299342	188493	164384	191025	206772	341080	163538	315037	797892	370805	355341	697594	660490	808878	549966	2529554	397227
	Pyruvate	6.9	4.8	9	87.0088	neg.	42532212	29238030	594422470	931821126	758733971	756699366	778292228	793399079	1051028474	846981043	652646394	868045938	987911198	1056620349	1075356973	1224221546	905669634	816231767	749958353	1055528228	1057096398	895175235	1088729436	989217562	802920797	1654956592	2509419774	1666900759	2757623250	1331485332
	Quinolinic Acid	6.45	4.9	8	166.015	neg.	399079	132095	1030358190	874204409	649782200	731964897	677789014	577047111	566472604	1102893162	664677729	1230637808	1565818717	808031232	988317040	756364368	1055269670	635919191	1126666343	858059034	1006825709	1940015167	932070464	1220628472	1646225994	2052952409	1721941360	2190679469	2971301677	1703858159
	Riboflavine	8.5	8	9	377.146	pos.	0	0	22964270	33147116	25530121	26286055	31976278	27655890	31343355	39522224	32373630	35773469	49104862	45218007	35784746	35773452	37033806	31446538	42191888	33157205	41200128	53500603	49156959	64507825	78953926	60404461	54583346	45776727	74052251	44884505
	Riboflavine	6.25	5	7.5	375.131	neg.	0	0	343135	1215611	681162	1035440	1408862	888949	949129	1392320	1100132	1648888	2037237	1910053	1186472	1266590	1466915	1212500	1641513	1063370	1957106	1841988	2187633	2661892	3577428	3874501	3839612	3666120	5382034	3080717
	S-Adenosylhomocysteine	13.2	12.7	13.7	385.129	pos.	0	0	31363118	32693772	32364957	41014090	34499348	31641975	51136327	37065696	25959321	60099048	49856873	58714994	49806237	58125631	54714105	48847233	45839254	52501498	56990786	36788812	36495324	47547023	40376675	81281355	110642362	95294648	152747457	87061908
	S-Adenosylhomocysteine	13.15	12.8	13.5	383.114	neg.	0	0	3968695	6807403	6606644	8718762	7709722	8175742	12527034	8686308	5665607	15050017	12441115	14013883	12892514	13224397	12598174	11459817	10885058	11356278	12854495	9079524	8648279	12038644	10968874	21857915	27893822	25802299	39799333	19738383
	S-Adenosylmethionine	12	11	13	399.145	pos.	3679	3574	14799	25242	13190	13376	0	25162	39970	6516	27955	28112	19538	0	12345	24738	21394	0	29994	0	34985	8893	0	0	18626	12800	0	26371	0	85957
	S-Adenosylmethionine	13	12	14	397.13	neg.	0	0	0	0	0	0	0	0	0	0	0	0	0	0	0	0	0	0	40569	0	0	0	0	0	0	0	0	0	0	0
	Serine	14.45	13.9	15	106.05	pos.	11043240	7067229	226279715	267836666	256493576	316939600	322713798	279130078	330522420	365435309	326803846	328771073	295625502	499760378	356120499	408330529	399192063	425588535	532176594	424806008	499594167	644183595	473798247	826639829	579292472	658659705	505040906	682692027	1063615398	611233270
	Serine	14.45	13.9	15	104.035	neg.	229873	147248	85412618	99085444	96093980	122405256	120538118	106819077	121427454	133649620	126825204	127521420	111544756	186745878	154493104	163545775	202060514	198938053	282782558	218766988	253241084	315820485	251958560	435028573	287823417	353058768	268211997	367060017	571056928	342043380
	Serotonine	13	12.3	13.7	177.102	pos.	3327	8045	3547554	3780004	4831314	3412164	3160692	3553489	4434631	3047543	2318045	2585467	3221491	3923579	3066928	3128479	3232712	4897578	3415404	3532872	3834152	2939700	4286176	5877541	3347699	4711505	5383291	3674659	6288282	6731824
	Serotonine	12.55	12.1	13	175.088	neg.	0	0	55684	529412	345338	226763	48165	259878	222723	589006	49231	0	99807	318188	743519	357006	846280	442318	309367	518600	983723	26204	482043	726198	11149	472698	44646	730249	1032475	1912738
	Spermidine	15.85	15.5	16.2	146.165	pos.	0	1577	217582	146268	55243	41493	119126	63542	30868	48372	29069	84261	147461	108636	103713	97442	116041	53356	120011	45817	37159	42602	94739	31871	69101	152701	291435	163190	159985	224635
	Succinate	7.75	6.5	9	119.034	pos.	1423	0	18517265	25687458	21485828	22881982	25277021	23309453	26109562	30238494	26061300	31914642	32297690	33574637	30982615	29559755	31451905	28243376	32980986	31588969	39971310	39846349	40275148	50376439	45006903	46111449	50375257	43669085	58529320	41999899
	Succinate	13.2	12.8	13.6	117.019	neg.	18651400	8672392	41305571	79158298	97925035	77471317	96606933	108122407	125585626	209688384	72733603	116048498	118520894	133688099	120324787	144813964	260214015	197884834	99830670	195364405	220037661	132901833	255618396	570917392	171828062	365026962	482277250	260883422	538808598	397560826
	Succinyl-CoA	16.85	16.5	17.2	868.139	pos.	0	0	0	0	0	0	0	4503	0	0	0	0	0	0	0	0	0	0	0	0	0	0	0	0	0	0	0	0	0	0
	Taurine	13.3	12.9	13.7	126.022	pos.	985817	887694	3210252664	3377091997	3321894077	3309195535	3151404867	2952885131	2795150609	3835283363	3196092973	3725458231	3719796874	3587328822	3942455746	3941636328	3899353851	3842729356	3740701632	3856422527	3702879037	3787525878	3772462647	3981243444	3800748368	4772463592	4902116097	4794062489	5841923624	4714310682
	Taurine	13.25	12.9	13.6	124.007	neg.	398170	180748	1544295234	1767794217	1745891907	1834076656	1633808964	1765864140	1695507741	2407000443	1937396024	2447945616	2608897646	2566869184	2870314786	2872300086	3303840988	2953786333	3265855227	3348759478	3401518246	3274097597	3360804406	3652688195	3451047273	4521288635	4713856296	4566441468	6210271040	4635719097
	TDP	5.55	5.3	5.8	419.025	pos.	0	0	0	0	0	0	0	0	0	0	0	0	0	0	0	0	0	0	0	0	0	0	0	0	0	0	0	0	0	0
	TDP	12.5	10	15	417.011	neg.	0	0	0	9499	0	0	0	0	0	0	0	0	8422	0	9573	0	0	0	0	0	0	0	6229	0	0	0	0	0	0	0
	Tetrahydrobiopterin	17.6	17	18.2	242.125	pos.	0	0	8727	747160	262380	322034	672546	788971	410825	1162981	137396	826655	205189	846303	1051775	905605	709833	1779837	1046736	613481	743281	494493	4213230	754573	1370005	4938452	1800138	2640391	12813106	3141670
	Tetrahydrofolate	12.5	10	15	446.178	pos.	0	0	0	0	10751	0	0	0	0	0	0	0	10867	11070	0	0	0	0	0	8104	0	0	0	0	0	0	20240	0	0	0
	Thiamine (+)	16.5	2	22	265.112	pos.	0	0	98617371	144519325	101656451	124257579	124736242	128942026	140289627	156795868	111992523	143878230	104457063	168528254	151323253	179243161	159821406	140211364	155530108	158641565	160456695	120942580	125765416	114637010	77249161	313371746	281068497	301376736	509110515	230107281
	Thiamine phosphate (+)	18.2	17.4	19	345.078	pos.	0	0	4428944	5408315	4994907	4942347	4074061	4102994	4458613	4286146	3251387	5335271	5848410	5565989	4456988	4915661	4674496	4563022	5786078	4223575	5849151	6348165	4214789	9222428	10485143	8173754	8493090	7453970	9312834	6998473
	Thiamine+	12	2	22	265.112	pos.	4433	0	93178229	139974375	95614313	118643446	119424923	123536071	136673362	152049910	105720326	140366897	100346920	157055493	146630493	165899360	148555650	129824351	144486862	149110081	149841315	110960610	116599931	105344144	70318044	293229197	264029874	277658078	471420048	211196976
	Threonine	13.9	13.3	14.5	120.066	pos.	4570552	3977110	301722786	351567414	351148252	423467913	423622473	408672942	467192642	472754901	440011409	406522324	385353335	615192011	485684471	537005053	532575661	563038778	664764330	578899678	642635417	755168546	579451886	884528057	584609918	905497195	763155682	874871276	1343001639	873973962
	Threonine	13.9	13.3	14.5	118.051	neg.	47817	17706	82957372	101035104	101628440	117014698	107353805	111473413	135389014	126007269	116369180	131707624	123744758	195024338	149322963	162975404	222822902	227027371	284997736	227804814	263302509	352080566	268486307	417681330	285913270	421355520	350416012	416675342	647095991	416627938
	Thymidin	13	12.7	13.3	259.092	pos.	20621	0	1957216	4606943	4095702	4781539	5799282	4387427	6226627	3358562	2305884	5786479	5828245	7560867	13229169	11709092	8898805	8511000	9036837	10433955	11807933	4535263	7394201	5333476	6854684	13471704	12089926	16449755	24206233	19836517
	Thymidine	9.3	8.9	9.7	243.098	pos.	20252	0	76496	146013	120412	60714	20167	61110	126552	11500	6047	113898	70477	213487	182267	162896	187879	253380	122347	222689	209455	26407	342930	142723	138537	224659	157238	254775	554737	279512
	Thymidine	11.85	11.5	12.2	257.078	neg.	5529	0	5470452	7465267	3929967	3731769	6334517	4448619	3486874	3926592	4673639	6397057	12080916	4766752	3442415	2934622	3245996	3071262	4328199	3070535	3193647	7131097	7210936	6061911	10535281	8255443	15573139	8629241	8028038	5911846
	Thymin	2.15	1.8	2.5	127.05	pos.	457358	336404	278032	374179	304473	341960	268212	343826	320260	351876	357018	376743	390606	457269	393285	381617	383637	346933	365824	449200	423227	401663	338763	433088	421701	506835	602057	618895	712844	748543
	Thymin	14	13.5	14.5	125.036	neg.	230904	359206	814983	721775	859021	876639	607958	966878	683055	653153	710174	874533	899430	1120450	935658	946913	1003255	948271	873720	972023	1029379	1120693	1383406	2185549	1587102	1941634	2035821	2134122	1969645	2773741
	TMP	11.7	11.4	12	339.059	pos.	0	0	3140825	4611511	3456714	3442294	4423607	4121990	4705756	5402600	3341760	3439191	3253938	4439561	3358464	3975865	4024589	3883949	2874787	3852818	4424138	6692496	3539148	4369310	1994336	5901757	5267637	3264152	6393380	5342374
	TMP	11.65	11.3	12	337.044	neg.	0	0	3369693	7526457	5571452	5909502	7761781	7562067	9137574	10775526	6337113	6318603	6192117	10638392	6399171	8740535	9691260	9604584	6998072	9623318	10864041	17151744	6986806	8993114	3660648	16794185	16182476	8863409	22882604	17350735
	Tryptophan	11	10.5	11.5	205.097	pos.	903258	1251277	458016353	597224136	571999231	618474775	625907823	566792723	624307430	721260206	602382288	639597129	637998757	894350479	705661735	831677869	723457714	858569841	855708979	771774233	846588884	961760277	708896526	1131361962	794747308	1091460762	955380259	1104683292	1749820247	1082371736
	Tryptophan	11	10.5	11.5	203.083	neg.	15322	11838	88210884	110569790	101680141	109606667	108014429	103214500	109952270	130626207	108118931	114103212	122632499	165464102	125952541	141685395	132910369	142888911	165283801	139616884	154689072	192713390	147800571	265144332	161748529	252427684	213224072	257074516	385350469	250683675
	TTP	17.45	15	19.9	482.997	pos.	0	0	0	0	0	4377	0	0	0	8339	0	0	0	0	0	0	0	0	0	0	0	0	0	0	5977	0	0	0	0	0
	TTP	17.45	15	19.9	496.977	neg.	0	0	0	0	0	0	0	0	0	0	0	0	0	0	0	0	0	0	0	0	0	0	0	0	0	0	0	0	0	11580
	Tyrosine	12.3	11.8	12.8	182.081	pos.	6472547	5759447	2508314514	2817078494	2980781018	3444677444	2929986636	3016582018	3385997005	3313185469	3028310749	2706496453	2768242031	3920730946	3587452451	4072429276	3604896716	4088002979	4223146027	4232561048	4044132245	4076037176	3380555984	4819287269	3128366793	4833427127	4492040770	5132118925	7422926303	5512084125
	Tyrosine	12.2	11.8	12.6	180.067	neg.	279976	378474	181820231	194534717	195841808	221695899	195829353	196041828	215581071	223283273	195794713	201425756	216117329	283630193	232979372	259065292	229436082	263849937	307914978	259778741	268853526	361592752	294164528	460640907	312120192	431254777	415041143	448136124	646240704	441792628
	UDP	13.2	12.8	13.6	405.009	pos.	0	0	20710	5803	58613	26504	0	17725	34477	26612	21931	5203	15201	22598	75816	106241	57813	16320	56226	37703	18164	5040925	326511	1323476	724224	38352	57281	11913	0	19544
	UDP	14.5	13	16	402.995	neg.	0	0	70348	249195	143585	306575	132538	208671	303525	183779	230575	53677	120399	99851	389670	539694	246982	208245	165481	517417	196251	433489	126503	314385	221349	242247	496586	317196	517945	635516
	UDP-Glc	13	12	14	567.062	pos.	0	0	0	0	0	0	0	0	0	0	0	0	0	0	0	0	0	0	0	0	0	256069	0	16763	0	0	0	0	0	0
	UDP-GlcNAc	13.2	12.7	13.7	608.089	pos.	0	0	2462018	3382443	3760214	4725526	4169024	4668339	6191209	4633892	4747423	4718595	4196880	6872879	9637230	10948733	8015647	7770611	7534204	7832872	7649155	8215317	3588470	5705758	3468925	5620185	5798088	8910113	9805284	7618267
	UDP-GlcNAc	13.15	12.5	13.8	606.074	neg.	0	0	2381523	3994757	4188679	5787476	5117907	7774707	9825267	7559397	6277981	8291984	7357766	10679265	17824086	17447592	13822945	12595283	13356324	13913588	13233958	12996028	6293206	12393682	6556057	11479562	10766360	17522319	22816161	14870818
	UDP-Glucuronate	13.5	12	15	581.042	pos.	0	0	0	0	0	0	0	0	0	0	0	0	0	0	0	0	0	0	0	0	0	0	0	0	0	0	0	0	0	0
	UMP	13.9	13.3	14.5	325.043	pos.	218484	58434	3859704	2480514	3011432	6054480	1796272	2968925	5796589	2475315	1605614	1274661	1438187	2400049	7211260	7607469	4279623	4565365	2652203	5844247	3139281	4790867	1375517	2616376	2241806	4341870	2919164	3173150	3902712	4344460
	UMP	13.8	13.2	14.4	323.029	neg.	143500	26509	5077416	3604851	4293594	8720783	2913747	4532306	8716092	3633084	2688164	2810858	3088513	4940279	12009522	12896208	8546993	9470924	6127516	12679067	7611988	10726377	3391669	7983148	5296632	13511699	7536545	9881172	13529774	13283161
	Uracil	8.4	8	8.8	113.035	pos.	77167	90532	170681869	183716982	155212513	149898966	162612408	148539588	179904730	232141412	153957178	197079375	197409898	230319126	221198363	216751818	169056210	138430810	188003204	197670165	208685669	225486913	178318152	234767255	225992229	229742758	205816100	189265540	319158969	194212802
	Uracil	3.15	2.3	4	111.02	neg.	1609159	721887	1007899416	1449916707	1044736536	1187313844	1452585331	1230239632	1423232711	1521760133	1343360065	1603629023	1810298574	1634134167	1332941521	1256638806	1163290353	1422018199	1492241904	1425651548	1416475326	1925010062	1852945282	1884754808	2139372496	2490050041	2986205081	2497095568	3269728700	2174919666
	Uric Acid	12.05	11.7	12.4	167.021	neg.	0	2323	27407855	31017185	23242044	19156284	18548133	17092198	22130063	18349207	17327333	19664270	20558907	18818620	20980286	23848388	26399930	20661109	32066384	17826224	26914639	31984958	33790299	33026823	34691999	37483837	37824379	50238983	55473036	31138973
	Uridin	8.4	8	8.8	245.077	pos.	0	0	196783357	212630852	181517721	176538612	187146783	174449937	214689361	277471175	179303817	227921475	233631866	277878375	263174780	248217856	205509844	172097836	226246748	244775294	243546526	275154314	226612080	292541478	279841112	279745080	251418018	236014928	392609025	236694590
	Uridin	8.3	7.5	9.1	243.062	neg.	0	0	1146293462	1301514314	1220617044	1287081886	1368540139	1240612832	1383694144	1642513179	1274238456	1603987067	1518779704	1679095873	1674588530	1597996592	1627575054	1366154936	1560135915	1652828346	1876793399	1661834940	1604358668	2033350993	1871181157	2528508902	2504198777	2363790360	2880721429	2425891103
	UTP	17.45	15	19.9	484.976	pos.	0	0	0	0	0	0	0	0	0	0	0	0	0	0	0	0	0	0	0	0	0	0	0	0	0	0	0	0	0	0
	UTP	17.45	15	19.9	482.961	neg.	0	0	0	0	0	0	0	0	0	0	0	0	0	0	0	0	0	0	0	0	0	0	0	0	0	0	0	0	0	0
	Valine	12.3	11.8	12.8	118.086	pos.	59965228	59405827	6155786631	8771374934	6014495973	7959210668	8447612352	7101655422	8324959771	7354204753	5570576866	9651546024	9929086966	10425591533	8419622473	7877880194	7867674081	9773028844	9166895520	6991937224	7463371915	6807824658	10958758468	9490117941	6937973016	12948701554	18864924086	12771443872	17154774015	11066295369
	Valine	12.15	11.8	12.5	116.072	neg.	300225	455659	243147173	304055694	264304811	323997234	310419695	283201352	323156325	335025768	315754424	356395503	392730379	507532382	363377723	400014183	392981125	400122318	511954592	415952230	454789559	626268648	553880469	831890930	615694534	788827716	834118560	775298538	1153148903	726315879
	Xanthin	8.25	7.5	9	153.041	pos.	0	3025	362906785	431504359	370669028	351251099	393297822	369459855	387752329	436538326	356852168	388783233	432552251	435681689	414981378	439509268	376877630	373448896	463809196	402989211	452402246	592869845	512527487	551379319	586929570	537676876	515798816	430007044	659838300	427139494
	Xanthin	8	7	9	151.026	neg.	28940	3177	4938937868	6766199674	5591858949	5839185139	6651477855	5965621212	6187905841	6969388316	6073219732	6861849572	7344371490	7202439728	6848980744	7053601991	6806733941	6625647650	7787777402	6674822340	8263923371	9019259706	9036500058	10224647738	10097991226	12258463753	12854525507	10955802566	14373871071	10437043250
	Xanthosin	11.9	11.5	12.3	285.083	pos.	0	0	97695996	157764558	121095428	150103582	152664329	165396383	153667710	150055875	127974181	102735403	114817915	138769942	147196191	186292218	150761654	194986550	205213133	165912697	153972382	177883096	135109732	163254576	118582702	222313081	202841376	157640773	301212307	170317618
	Xanthosin	11.9	11.5	12.3	283.068	neg.	0	0	62730266	98372061	78040096	88909385	97548011	106775973	102131570	94494220	83609411	60059730	66391534	84506512	87427306	122434098	100232681	120925830	132938632	116642092	102922776	130474217	94488454	117698267	84576464	174080957	167921613	127126088	243299650	131099977
	Xanthurenic Acid	9.3	8.9	9.7	206.045	pos.	4895	0	897964	1231768	1199415	787886	537072	762427	1080442	11637	106960	1252684	937137	1726882	2290634	1110767	1240364	2326967	804387	732332	2365887	1067743	2329561	1842646	1812688	1526523	2225067	686801	2851205	2683862
	Xanthurenic Acid	13	12.6	13.4	204.03	neg.	3607	0	272358	434107	711879	884020	644913	2437731	1701338	765391	743578	461061	850271	2102237	1587532	1844423	784193	2217281	803541	2611209	866809	786950	1028179	830594	328344	1628181	1826334	1252941	2657882	1717344
	XMP	5	4.5	5.5	365.049	pos.	0	0	0	0	0	0	0	0	0	0	0	0	0	0	0	0	0	0	0	0	0	0	0	0	0	0	0	0	0	0
	XMP	14	13.4	14.6	363.035	neg.	0	0	78907	266336	125439	169351	233787	118653	336047	460792	64496	274084	395860	271689	549494	458175	749687	284640	225212	566596	522632	529813	305123	262367	119233	1974364	3029094	1781672	2721929	1276246
	Abs. Peak Area	selected compounds
	Compound	RT	Range		MIM	Mode	Blanks		293	295	296	300	301	303	304	307	310	314	315	316	317	318	319	321	322	323	324	325	326	327	328	331	332	333	334	335
		[min]			[Da]		Blank_01	Blank_02	Sample_01	Sample_02	Sample_03	Sample_04	Sample_05	Sample_06	Sample_07	Sample_08	Sample_09	Sample_10	Sample_11	Sample_12	Sample_13	Sample_14	Sample_15	Sample_16	Sample_17	Sample_18	Sample_19	Sample_20	Sample_21	Sample_22	Sample_23	Sample_24	Sample_25	Sample_26	Sample_27	Sample_28
	(Iso)Leucine	11.1	10.5	11.7	132.102	pos.	61724523	44936831	4895306420	6126412332	5620110685	6276869493	6249128882	5743497723	6398129073	6639968773	6306125816	6524780556	6513388136	8898825026	6919544086	7963669771	7095576179	7957139516	8410577511	7479385492	8247898272	9630216624	7852760672	11330349328	8095268145	11111598944	10205147771	10537800417	16407852912	10348217196
	Alanine	13.5	13	14	90.055	pos.	11339897	12012092	865346781	1021214008	974114081	1105379261	1160680962	1140147666	1259663716	1044361085	1022446729	1185714204	1302626379	1568259744	1267853769	1354521515	1472712482	1448316237	1423415024	1492979289	1407886885	1573340779	1899816521	1795466428	1486904106	2643338438	2396657416	2202645942	3466206386	2057490627
	Arginine	12.25	11	13.5	175.119	pos.	41989133	15758502	3770238	3043814	2107134	1272982	1359801	1005131	714113	562799	712672	471703	365057	197268	471752	339509	255124	366569	624638	387537	319822	310132	175405	75682	180806	542573	148964	169954	74728	284954
	Asparagine	14.5	14	15	133.061	pos.	3693671	1643862	63457554	67025197	85576787	77079282	60935604	68328705	96084409	68871208	80856384	63265510	56774877	133236174	112342497	146023404	120732071	110343793	112193185	100943404	96977943	156998103	101781467	246940099	84875507	111798459	91957519	127322351	294107091	122295002
	Aspartate	13.75	13	14.5	132.03	neg.	1533538	649131	394580299	402894544	384813149	384068738	401256891	372213533	368065196	414191242	467784090	451284584	476162381	563336195	393493180	435821309	513447843	534315891	685345252	505591421	640656310	910019903	744445186	1018471285	891484917	1028622660	859142445	1003471336	1287006626	1119108919
	Cysteine	13.4	12.8	14	122.027	pos.	40023	32759	4306726	10614264	10715045	11186281	11708804	13668786	14527460	21001003	10984314	14028510	20789645	33570705	20149822	22299084	22051228	24700808	34227905	32578597	32283176	27457384	40662704	68990239	24441225	58329713	47161766	54538936	123046217	54165905
	Cystine	16.6	15.5	17.7	241.031	pos.	834026	150164	5467864	2203287	2792891	2090391	1568312	1508677	1415191	1638043	2388015	983344	1785303	1384591	754038	714436	593449	718090	986125	1093803	541404	2295040	1454272	3111677	2105845	761656	573470	614780	448265	376952
	Glutamate	13.8	13.3	14.3	146.046	neg.	2398007	1547936	739751100	1054997017	890524988	931140567	1206206528	836849466	1216702463	1330237441	1372895490	1367537784	1236371922	1289744906	1198441082	1105945617	1844350180	1516929880	1959290306	1559572674	1876996863	2198109998	1765694814	1926674580	2077764088	3094249214	2649399700	2803574374	3465269729	2648560264
	Glutamine	14.1	13.5	14.7	147.076	pos.	8227926	5545873	1599049350	1072802618	1460705582	1372542490	901449892	1466513086	911812335	615907879	635715040	1014073583	940058199	1128709633	1087721551	927079072	950864814	1074931702	763766423	1112519712	1011910438	1444718697	1181467069	2417069931	1662676632	1169674011	580334643	1098640327	1466772914	1902619255
	Glycine	14.25	13.8	14.7	76.0393	pos.	5523654	4873350	110386019	151891855	127673301	156044898	159635219	139082350	171747506	184639938	149630554	170839562	160082419	197249996	183447991	202895254	215775210	186912785	214872257	201738481	222173602	248476152	213847054	274146573	298074106	333027734	274669888	329732973	505964577	286775893
	GSH	13.5	13	14	308.091	pos.	2040581	4433142	1199528360	1964087154	1676307312	1508820315	1627007666	1688665549	1817985073	1887353865	1034323800	1620716852	1507557177	2105843055	1966581084	2126585109	1927392145	1777429576	1854791218	2026928839	2072209392	886636483	1724375895	1455886977	858361212	2334498223	2634117299	2396638805	3571818904	2667319116
	GSSG	14.5	14	15	613.159	pos.	0	0	159341484	161365761	196161431	203076148	195351652	140085737	153310587	140355878	113075489	200934845	219341612	240075908	203487078	212259759	211322472	212430597	256378209	206875797	282422181	297623884	228229278	287130390	347785852	311766755	270169530	284199195	372155258	297764852
	Histidine	17.35	15.9	18.8	156.077	pos.	24264533	9013296	3745254115	4602523523	4289523069	4986389344	4802678635	4167084335	4693679385	4720609761	4573531420	5461566953	4806007808	5703044235	4879059214	4679227137	4534461449	4848724381	5283180889	4814058436	5512900209	5442395254	5108775856	5861315243	5626866091	9528108825	8980317806	8894996044	8762985183	8286143946
	Lamivudin	3.8	2.5	5.3	230.059	pos.	1169295	2558332	6882256855	7945101014	7506864918	7963283637	8233126500	8282245630	8238268465	8449939679	8448419530	8783030957	8807998765	9229096349	9412250343	9326044900	9180393060	8888589175	9427284904	9341613734	10275427884	10279475751	10556295496	10099421730	10083353801	10583446986	10935084818	10924386909	1838497469	13389417868
	Lamivudin	3.65	2.3	5	228.045	neg.	0	0	144018237	196757331	204981570	219855880	232685552	234478860	230963385	242514176	246960861	252801234	253071620	262451086	279645034	278779308	255866021	248807680	260130122	265204944	313590640	285328540	322925713	304152250	293231756	386035128	402642364	422344781	30578786	616789340
	Methionine	11.85	11.2	12.5	150.058	pos.	320037	353436	1677477356	2143657159	1842456921	1993519610	2002740441	1852295421	2148223999	2205059305	1985241224	2088122910	2278311350	2724566913	2164172479	2488561742	2252788001	2398924379	2597714966	2328803994	2628544221	2690801730	2424379177	3057796409	2360676719	3503753064	3493778385	3185066734	4475690953	3484479644
	Phenylalanine	10.75	10.2	11.3	166.086	pos.	8333803	6610708	2588767952	3251484553	2910450726	3334998583	3073026723	3093269981	3413242579	3413539913	3066012986	3220128567	3418820546	4705667744	3554119595	4144370020	3521830809	3963703378	4333848059	3963093061	4129111651	4958829098	3916763796	5892878134	3773775836	5349799729	5181605401	4988492154	7889254095	5242072656
	Phenylpyruvate	12.3	11.8	12.8	165.055	pos.	0	0	310562315	344742659	372498250	426090155	362678213	371853334	423892067	407586777	373661133	330889249	337115397	484467626	446680489	502753452	439774488	497994437	513718584	513567523	493131148	495100883	401382877	571739463	362753564	592725922	545043820	634942885	913208181	675552281
	Proline	12.85	12.5	13.2	116.071	pos.	14643127	5195675	1430487810	1932077169	1478506346	1683440035	2041533414	1742886500	1996988371	2219167816	1987845985	2232804350	2341795603	2791510488	2227397735	2394969089	2380693441	2394387655	2459057189	2382714464	2618819806	3063934293	3226331768	3456349290	2815875005	4085331230	4024422153	3700434144	6155298188	3710295101
	Serine	14.45	13.9	15	106.05	pos.	11043240	7067229	226279715	267836666	256493576	316939600	322713798	279130078	330522420	365435309	326803846	328771073	295625502	499760378	356120499	408330529	399192063	425588535	532176594	424806008	499594167	644183595	473798247	826639829	579292472	658659705	505040906	682692027	1063615398	611233270
	Tryptophan	11	10.5	11.5	205.097	pos.	903258	1251277	458016353	597224136	571999231	618474775	625907823	566792723	624307430	721260206	602382288	639597129	637998757	894350479	705661735	831677869	723457714	858569841	855708979	771774233	846588884	961760277	708896526	1131361962	794747308	1091460762	955380259	1104683292	1749820247	1082371736
	Tyrosine	12.3	11.8	12.8	182.081	pos.	6472547	5759447	2508314514	2817078494	2980781018	3444677444	2929986636	3016582018	3385997005	3313185469	3028310749	2706496453	2768242031	3920730946	3587452451	4072429276	3604896716	4088002979	4223146027	4232561048	4044132245	4076037176	3380555984	4819287269	3128366793	4833427127	4492040770	5132118925	7422926303	5512084125
	Valine	12.3	11.8	12.8	118.086	pos.	59965228	59405827	6155786631	8771374934	6014495973	7959210668	8447612352	7101655422	8324959771	7354204753	5570576866	9651546024	9929086966	10425591533	8419622473	7877880194	7867674081	9773028844	9166895520	6991937224	7463371915	6807824658	10958758468	9490117941	6937973016	12948701554	18864924086	12771443872	17154774015	11066295369
	Norm. Peak Area	selected compounds
	Compound	RT	Range		MIM	Mode			293	295	296	300	301	303	304	307	310	314	315	316	317	318	319	321	322	323	324	325	326	327	328	331	332	333	334	335
		[min]			[Da]				Sample_01	Sample_02	Sample_03	Sample_04	Sample_05	Sample_06	Sample_07	Sample_08	Sample_09	Sample_10	Sample_11	Sample_12	Sample_13	Sample_14	Sample_15	Sample_16	Sample_17	Sample_18	Sample_19	Sample_20	Sample_21	Sample_22	Sample_23	Sample_24	Sample_25	Sample_26	Sample_27	Sample_28
	(Iso)Leucine	11.1	10.5	11.7	132.102	pos.			0.711294	0.771093	0.748663	0.788226	0.759023	0.693471	0.776635	0.785801	0.746427	0.742885	0.739486	0.964214	0.735164	0.853917	0.772905	0.895208	0.892153	0.800652	0.802682	0.936839	0.743894	1.12188	0.802835	1.0499	0.933248	0.964613	8.9246	0.772865
	Alanine	13.5	13	14	90.055	pos.			0.125736	0.128534	0.129763	0.138809	0.140977	0.137662	0.152904	0.123594	0.121022	0.135001	0.147891	0.169926	0.134703	0.145241	0.160419	0.162941	0.150989	0.15982	0.137015	0.153057	0.17997	0.177779	0.147461	0.249762	0.219171	0.201627	1.88535	0.153665
	Arginine	12.25	11	13.5	175.119	pos.			0.00054782	0.000383106	0.000280694	0.000159856	0.000165162	0.00012136	8.66824e-05	6.66039e-05	8.43557e-05	5.37062e-05	4.14461e-05	2.13746e-05	5.01211e-05	3.64044e-05	2.77901e-05	4.12404e-05	6.62585e-05	4.1485e-05	3.11249e-05	3.017e-05	1.66162e-05	7.4937e-06	1.79311e-05	5.12662e-05	1.36226e-05	1.55573e-05	4.06462e-05	2.1282e-05
	Asparagine	14.5	14	15	133.061	pos.			0.00922046	0.00843604	0.0113998	0.00967933	0.00740127	0.00825002	0.0116632	0.0081505	0.00957059	0.00720315	0.00644583	0.0144365	0.0119358	0.0156576	0.0131511	0.0124141	0.0119009	0.0108058	0.00943785	0.015273	0.00964178	0.0244509	0.00841739	0.0105635	0.0084094	0.0116549	0.159971	0.00913371
	Aspartate	13.75	13	14.5	132.03	neg.			0.273979	0.204767	0.187731	0.174691	0.172446	0.158741	0.159361	0.170791	0.189416	0.178514	0.188153	0.214644	0.140712	0.156332	0.200671	0.214751	0.263462	0.190642	0.204297	0.318938	0.230531	0.334856	0.304021	0.266458	0.213376	0.237595	4.20882	0.181441
	Cysteine	13.4	12.8	14	122.027	pos.			0.000625772	0.00133595	0.00142737	0.00140473	0.00142216	0.00165037	0.00176341	0.00248534	0.00130016	0.00159723	0.00236031	0.00363749	0.00214081	0.00239105	0.00240199	0.00277893	0.00363073	0.00348747	0.00314178	0.00267109	0.00385199	0.00683111	0.00242392	0.00551141	0.00431289	0.0049924	0.0669276	0.00404543
	Cystine	16.6	15.5	17.7	241.031	pos.			0.000794487	0.000277314	0.000372045	0.000262504	0.000190488	0.000182158	0.000171783	0.000193853	0.000282658	0.00011196	0.000202691	0.000150025	8.01124e-05	7.66065e-05	6.46431e-05	8.07878e-05	0.000104603	0.000117089	5.26892e-05	0.000223264	0.000137763	0.000308104	0.000208844	7.19667e-05	5.24431e-05	5.62759e-05	0.000243821	2.8153e-05
	Glutamate	13.8	13.3	14.3	146.046	neg.			0.513651	0.536192	0.434441	0.423523	0.518385	0.356898	0.526795	0.548519	0.555916	0.540954	0.488546	0.491423	0.428558	0.39671	0.720827	0.60968	0.753196	0.588063	0.59855	0.770379	0.54678	0.633457	0.708574	0.801546	0.658003	0.663812	11.3323	0.429411
	Glutamine	14.1	13.5	14.7	147.076	pos.			0.232344	0.135027	0.194583	0.172359	0.109491	0.177067	0.11068	0.072889	0.0752466	0.115458	0.106728	0.122299	0.115564	0.0994075	0.103576	0.120934	0.0810166	0.119093	0.0984787	0.140544	0.111921	0.239328	0.164893	0.110519	0.0530709	0.100568	0.797811	0.142099
	Glycine	14.25	13.8	14.7	76.0393	pos.			0.0160392	0.0191177	0.0170075	0.0195955	0.0193894	0.0167928	0.0208475	0.021851	0.0177111	0.0194511	0.0181747	0.0213726	0.0194903	0.0217558	0.0235039	0.0210284	0.0227926	0.0215957	0.0216218	0.0241721	0.0202578	0.0271448	0.029561	0.0314668	0.0251182	0.0301832	0.275205	0.0214181
	GSH	13.5	13	14	308.091	pos.			0.174293	0.247207	0.223303	0.189472	0.197617	0.20389	0.220676	0.223357	0.122428	0.184528	0.171158	0.228174	0.208938	0.228026	0.209947	0.199968	0.196747	0.216978	0.201666	0.0862531	0.16335	0.144155	0.0851266	0.22058	0.240887	0.219384	1.94279	0.199211
	GSSG	14.5	14	15	613.159	pos.			0.0231525	0.0203101	0.0261309	0.0255016	0.0237275	0.016914	0.0186096	0.0166103	0.0133842	0.0228776	0.0249025	0.0260129	0.0216194	0.0227599	0.0230189	0.0238992	0.0271953	0.0221456	0.0274852	0.0289532	0.0216202	0.0284304	0.0344911	0.029458	0.0247067	0.0260151	0.202424	0.0222388
	Histidine	17.35	15.9	18.8	156.077	pos.			0.54419	0.579291	0.571413	0.626173	0.583336	0.503135	0.569741	0.558656	0.541348	0.621832	0.545641	0.617942	0.518373	0.501738	0.493929	0.5455	0.560414	0.515335	0.536513	0.529443	0.483955	0.580361	0.558035	0.900284	0.821239	0.814233	4.76638	0.618858
	Methionine	11.85	11.2	12.5	150.058	pos.			0.243739	0.269809	0.245436	0.250339	0.243254	0.223647	0.260762	0.260956	0.234984	0.237745	0.258664	0.295215	0.229931	0.26684	0.245391	0.269888	0.275553	0.249294	0.255809	0.261764	0.229662	0.302769	0.234116	0.33106	0.319502	0.291556	2.43443	0.260241
	Phenylalanine	10.75	10.2	11.3	166.086	pos.			0.376151	0.409244	0.387705	0.418797	0.373251	0.373482	0.414316	0.403972	0.36291	0.366631	0.38815	0.509873	0.377606	0.444387	0.383625	0.445932	0.459713	0.424241	0.401843	0.482401	0.371036	0.583487	0.374258	0.505487	0.473851	0.456638	4.29114	0.391509
	Phenylpyruvate	12.3	11.8	12.8	165.055	pos.			0.0451251	0.0433906	0.049621	0.0535068	0.0440511	0.0448976	0.051454	0.0482355	0.0442285	0.0376737	0.0382738	0.0524935	0.0474574	0.0539085	0.0479037	0.0560263	0.0544927	0.0549763	0.0479913	0.048164	0.0380231	0.0566111	0.0359755	0.056005	0.0498436	0.0581216	0.496714	0.0504542
	Proline	12.85	12.5	13.2	116.071	pos.			0.207852	0.243178	0.196954	0.2114	0.247966	0.210436	0.242404	0.262625	0.235292	0.254218	0.265871	0.302468	0.236649	0.256804	0.259324	0.269378	0.260845	0.255065	0.254862	0.298063	0.305631	0.342232	0.27926	0.386011	0.368028	0.338732	3.348	0.277107
	Serine	14.45	13.9	15	106.05	pos.			0.0328787	0.0337109	0.0341679	0.0398001	0.039197	0.0337022	0.0401204	0.0432471	0.0386822	0.0374325	0.0335633	0.0541505	0.0378359	0.0437839	0.0434831	0.0478803	0.0564507	0.0454746	0.0486203	0.062667	0.044883	0.0818502	0.0574504	0.0622349	0.0461854	0.0624925	0.578524	0.0456505
	Tryptophan	11	10.5	11.5	205.097	pos.			0.0665503	0.0751689	0.0761968	0.0776658	0.0760231	0.0684347	0.0757814	0.0853568	0.0713012	0.0728219	0.072434	0.0969055	0.0749727	0.089178	0.0788047	0.0965924	0.0907694	0.0826168	0.0823896	0.0935612	0.0671539	0.112022	0.0788178	0.103129	0.0873683	0.101121	0.951766	0.0808378
	Tyrosine	12.3	11.8	12.8	182.081	pos.			0.364461	0.354568	0.397074	0.43257	0.355878	0.364223	0.411008	0.392096	0.358447	0.308151	0.314287	0.424823	0.381147	0.436673	0.392673	0.459916	0.447971	0.453087	0.393573	0.396522	0.320241	0.477184	0.310251	0.456697	0.410792	0.469786	4.0375	0.411675
	Valine	12.3	11.8	12.8	118.086	pos.			0.894443	1.104	0.801199	0.999489	1.02605	0.857455	1.01052	0.870326	0.659363	1.09889	1.12728	1.12964	0.894539	0.844718	0.857008	1.0995	0.972379	0.748472	0.726332	0.662274	1.03813	0.939669	0.688062	1.22349	1.72517	1.16908	9.33087	0.826496
							Amino Acids tot.:		4.6137	4.87385	4.43544	4.78468	4.67366	4.18517	4.78539	4.61138	4.21902	4.73883	4.70372	5.43299	4.33937	4.57557	4.75172	5.27436	5.3033	4.66778	4.5752	5.1486	4.70755	5.98531	4.74845	6.49417	6.36686	5.91869	57.3896	4.62647
							Ratio Phe:Tyr		1.03207	1.1542	0.976405	0.96816	1.04882	1.02542	1.00805	1.03029	1.01245	1.18978	1.23502	1.2002	0.990708	1.01767	0.976957	0.969594	1.02621	0.936335	1.02101	1.21658	1.15862	1.22277	1.20631	1.10683	1.15351	0.972014	1.06282	0.951015
													0.364461

## Sheet: total aminoacids
									293	295	296	300	301	303	304	307	310	314	315	316	317	318	319	321	322	323	324	325	326	327	328	331	332	333	334	335
									Sample_01	Sample_02	Sample_03	Sample_04	Sample_05	Sample_06	Sample_07	Sample_08	Sample_09	Sample_10	Sample_11	Sample_12	Sample_13	Sample_14	Sample_15	Sample_16	Sample_17	Sample_18	Sample_19	Sample_20	Sample_21	Sample_22	Sample_23	Sample_24	Sample_25	Sample_26	Sample_27	Sample_28
							Amino Acids tot.:		4.6137	4.87385	4.43544	4.78468	4.67366	4.18517	4.78539	4.61138	4.21902	4.73883	4.70372	5.43299	4.33937	4.57557	4.75172	5.27436	5.3033	4.66778	4.5752	5.1486	4.70755	5.98531	4.74845	6.49417	6.36686	5.91869	57.3896	4.62647
											control	PKD3tg
											4.6137	4.43544
											4.87385	4.78468
											4.67366	4.18517
											4.61138	4.78539
											4.73883	4.21902
											4.70372	5.43299
											5.3033	4.33937
											5.1486	4.57557
											4.70755	4.75172
											6.49417	5.27436
											6.36686	4.66778
											5.91869	4.5752
												5.98531
												4.74845
												4.62647
											5.17953	4.75913
											0.201065	0.123831
												0.0753691

## Sheet: phenylalanine
									293	295	296	300	301	303	304	307	310	314	315	316	317	318	319	321	322	323	324	325	326	327	328	331	332	333	334	335
									Sample_01	Sample_02	Sample_03	Sample_04	Sample_05	Sample_06	Sample_07	Sample_08	Sample_09	Sample_10	Sample_11	Sample_12	Sample_13	Sample_14	Sample_15	Sample_16	Sample_17	Sample_18	Sample_19	Sample_20	Sample_21	Sample_22	Sample_23	Sample_24	Sample_25	Sample_26	Sample_27	Sample_28
	Phenylalanine	10.75	10.2	11.3	166.086	pos.			0.376151	0.409244	0.387705	0.418797	0.373251	0.373482	0.414316	0.403972	0.36291	0.366631	0.38815	0.509873	0.377606	0.444387	0.383625	0.445932	0.459713	0.424241	0.401843	0.482401	0.371036	0.583487	0.374258	0.505487	0.473851	0.456638	4.29114	0.391509
											control	PKD3tg
											0.376151	0.387705
											0.409244	0.418797
											0.373251	0.373482
											0.403972	0.414316
											0.366631	0.36291
											0.38815	0.509873
											0.459713	0.377606
											0.482401	0.444387
											0.371036	0.383625
											0.505487	0.445932
											0.473851	0.424241
											0.456638	0.401843
												0.583487
												0.374258
												0.391509
											0.42221	0.419598
											0.0144871	0.0152662
												0.90401

## Sheet: tyrosin
									293	295	296	300	301	303	304	307	310	314	315	316	317	318	319	321	322	323	324	325	326	327	328	331	332	333	334	335
									Sample_01	Sample_02	Sample_03	Sample_04	Sample_05	Sample_06	Sample_07	Sample_08	Sample_09	Sample_10	Sample_11	Sample_12	Sample_13	Sample_14	Sample_15	Sample_16	Sample_17	Sample_18	Sample_19	Sample_20	Sample_21	Sample_22	Sample_23	Sample_24	Sample_25	Sample_26	Sample_27	Sample_28
	Tyrosine	12.3	11.8	12.8	182.081	pos.			0.364461	0.354568	0.397074	0.43257	0.355878	0.364223	0.411008	0.392096	0.358447	0.308151	0.314287	0.424823	0.381147	0.436673	0.392673	0.459916	0.447971	0.453087	0.393573	0.396522	0.320241	0.477184	0.310251	0.456697	0.410792	0.469786	4.0375	0.411675
											control	PKD3tg
											0.364461	0.397074
											0.354568	0.43257
											0.355878	0.364223
											0.392096	0.411008
											0.308151	0.358447
											0.314287	0.424823
											0.447971	0.381147
											0.396522	0.436673
											0.320241	0.392673
											0.456697	0.459916
											0.410792	0.453087
											0.469786	0.393573
												0.477184
												0.310251
												0.411675
											0.382621	0.406955
											0.0161364	0.0112207
												0.214397

## Sheet: tyrosin to total
									293	295	296	300	301	303	304	307	310	314	315	316	317	318	319	321	322	323	324	325	326	327	328	331	332	333	334	335
									Sample_01	Sample_02	Sample_03	Sample_04	Sample_05	Sample_06	Sample_07	Sample_08	Sample_09	Sample_10	Sample_11	Sample_12	Sample_13	Sample_14	Sample_15	Sample_16	Sample_17	Sample_18	Sample_19	Sample_20	Sample_21	Sample_22	Sample_23	Sample_24	Sample_25	Sample_26	Sample_27	Sample_28
	Tyrosine	12.3	11.8	12.8	182.081	pos.			0.364461	0.354568	0.397074	0.43257	0.355878	0.364223	0.411008	0.392096	0.358447	0.308151	0.314287	0.424823	0.381147	0.436673	0.392673	0.459916	0.447971	0.453087	0.393573	0.396522	0.320241	0.477184	0.310251	0.456697	0.410792	0.469786	4.0375	0.411675
											tyrosine		total			tyrosine to total
											control	PKD3tg	control	PKD3tg
											0.364461	0.397074	4.6137	4.43544		0.0789954	0.089523
											0.354568	0.43257	4.87385	4.78468		0.072749	0.0904073
											0.355878	0.364223	4.67366	4.18517		0.0761455	0.087027
											0.392096	0.411008	4.61138	4.78539		0.0850278	0.0858881
											0.308151	0.358447	4.73883	4.21902		0.0650267	0.0849598
											0.314287	0.424823	4.70372	5.43299		0.0668168	0.0781931
											0.447971	0.381147	5.3033	4.33937		0.0844701	0.0878347
											0.396522	0.436673	5.1486	4.57557		0.0770155	0.0954357
											0.320241	0.392673	4.70755	4.75172		0.068027	0.0826382
											0.456697	0.459916	6.49417	5.27436		0.0703241	0.0871983
											0.410792	0.453087	6.36686	4.66778		0.0645202	0.0970668
											0.469786	0.393573	5.91869	4.5752		0.0793732	0.0860232
												0.477184		5.98531			0.0797259
												0.310251		4.74845			0.0653372
												0.411675		4.62647			0.0889824
											0.382621	0.406955				0.0740409	0.0857494
											0.0161364	0.0112207				0.00208071	0.00194791
												0.214397					0.000396797

## Sheet: tyrosin to phenylalanine
									293	295	296	300	301	303	304	307	310	314	315	316	317	318	319	321	322	323	324	325	326	327	328	331	332	333	334	335
									Sample_01	Sample_02	Sample_03	Sample_04	Sample_05	Sample_06	Sample_07	Sample_08	Sample_09	Sample_10	Sample_11	Sample_12	Sample_13	Sample_14	Sample_15	Sample_16	Sample_17	Sample_18	Sample_19	Sample_20	Sample_21	Sample_22	Sample_23	Sample_24	Sample_25	Sample_26	Sample_27	Sample_28
	Tyrosine	12.3	11.8	12.8	182.081	pos.			0.364461	0.354568	0.397074	0.43257	0.355878	0.364223	0.411008	0.392096	0.358447	0.308151	0.314287	0.424823	0.381147	0.436673	0.392673	0.459916	0.447971	0.453087	0.393573	0.396522	0.320241	0.477184	0.310251	0.456697	0.410792	0.469786	4.0375	0.411675
											tyrosine		phenylalanine			tyrosine to phenyalanie
											control	PKD3tg	control	PKD3tg
											0.364461	0.397074	0.376151	0.387705		0.968922	1.02416
											0.354568	0.43257	0.409244	0.418797		0.866398	1.03289
											0.355878	0.364223	0.373251	0.373482		0.953453	0.975208
											0.392096	0.411008	0.403972	0.414316		0.970601	0.992018
											0.308151	0.358447	0.366631	0.36291		0.840493	0.987703
											0.314287	0.424823	0.38815	0.509873		0.809707	0.833193
											0.447971	0.381147	0.459713	0.377606		0.974456	1.00938
											0.396522	0.436673	0.482401	0.444387		0.821976	0.982641
											0.320241	0.392673	0.371036	0.383625		0.863099	1.02359
											0.456697	0.459916	0.505487	0.445932		0.903478	1.03136
											0.410792	0.453087	0.473851	0.424241		0.866921	1.06799
											0.469786	0.393573	0.456638	0.401843		1.02879	0.979419
												0.477184		0.583487			0.817816
												0.310251		0.374258			0.828975
												0.411675		0.391509			1.05151
											0.382621	0.406955				0.905691	0.975857
											0.0161364	0.0112207				0.0205443	0.0211171
												0.214397					0.0273363
